# Supplementary material for: Influence of acceptors on the optical nonlinearity of 5H-4-oxa-1,6,9-trithia-cyclopenta[b]-as-indacene-based chromophores with a push–pull assembly: a DFT approach
Source: Royal Society of Chemistry journal article supplement (doi:10.1039/d3ra06673h), 2024-01-01
Supplement: d3ra06673h1.pdf [file d3ra06673h1.pdf]

## Influence of Acceptors on Optical Nonlinearity of 5H-4-Oxa-1,6,9-trithia-cyclopenta[b]-as-indacene Based Chromophores with Push-pull Assembly: A DFT Approach

Muhammad Khalid,<sup>\*a,b</sup> Shahzad Murtaza<sup>a,b</sup> Khansa Gull<sup>a,b</sup> Saba Abid<sup>a,b</sup>, Muhammad Imran<sup>c</sup>,  
Ataulpa A.C. Braga,<sup>d</sup>

<sup>a</sup>Institute of Chemistry, Khwaja Fareed University of Engineering & Information Technology, Rahim Yar Khan, 64200, Pakistan

<sup>b</sup>Centre for Theoretical and Computational Research, Khwaja Fareed University of Engineering & Information Technology, Rahim Yar Khan, 64200, Pakistan

<sup>c</sup>Department of Chemistry, Faculty of Science, King Khalid University, P.O. Box 9004, Abha 61413, Saudi Arabia

<sup>d</sup>Departamento de Química Fundamental, Instituto de Química, Universidade de São Paulo, Av. Prof. Lineu Prestes, 748, São Paulo, 05508-000, Brazil

\*Corresponding author E-mail addresses:

Dr. Muhammad Khalid ([muhhammad.khalid@kfueit.edu.pk](mailto:muhhammad.khalid@kfueit.edu.pk); [khalid@iq.usp.br](mailto:khalid@iq.usp.br))

**Table S1:** Cartesian coordinates of TPR.

| Atom | X-axis   | Y-axis   | Z-axis   |
|------|----------|----------|----------|
| C    | 2.058923 | -0.53545 | -0.60282 |
| C    | 1.410507 | 0.673157 | -0.41838 |
| C    | 3.382908 | 1.980365 | -0.80577 |
| C    | 4.137201 | 0.683863 | -0.61224 |
| C    | 3.47806  | -0.53029 | -0.59419 |
| C    | 5.524382 | 0.504395 | -0.52847 |
| C    | 5.920945 | -0.84056 | -0.46143 |
| S    | 6.882579 | 1.556399 | -0.48569 |
| C    | 7.29147  | -1.04103 | -0.38128 |
| C    | 7.988588 | 0.165269 | -0.38875 |
| H    | 7.801412 | -1.99312 | -0.31839 |
| C    | 0.016846 | 0.510211 | -0.34092 |
| C    | -0.37119 | -0.81743 | -0.45083 |
| S    | -1.32027 | 1.592107 | -0.10783 |
| C    | -1.76242 | -0.97955 | -0.36511 |
| C    | -2.41414 | 0.227093 | -0.18263 |
| S    | 4.539384 | -1.90897 | -0.47549 |
| S    | 0.964595 | -1.90029 | -0.68045 |
| C    | -3.83255 | 0.211584 | -0.21812 |
| C    | -6.26754 | 0.496493 | -0.43838 |
| C    | -5.87107 | -0.84229 | -0.27932 |

|   |          |          |          |
|---|----------|----------|----------|
| S | -4.89336 | 1.571282 | -0.45541 |
| S | -7.24136 | -1.88296 | -0.24531 |
| C | -4.48496 | -1.00806 | -0.14326 |
| C | -7.63654 | 0.696672 | -0.53717 |
| H | -8.13961 | 1.645742 | -0.66311 |
| C | -8.34185 | -0.50006 | -0.44976 |
| O | 2.029653 | 1.847495 | -0.25769 |
| O | -2.39845 | -2.14799 | -0.51198 |
| C | 9.352616 | 0.502599 | -0.29654 |
| C | -3.6854  | -2.24718 | 0.172671 |
| C | 10.51046 | -0.23835 | -0.25308 |
| C | 11.84736 | 0.322942 | -0.14527 |
| C | 10.64766 | -1.69575 | -0.43491 |
| C | 12.7094  | -3.17508 | -0.77331 |
| C | 12.09627 | -1.95905 | -0.54841 |
| C | 12.80676 | -0.76694 | -0.40336 |
| C | 14.19463 | -0.78163 | -0.49862 |
| C | 14.80916 | -1.99459 | -0.73432 |
| C | 14.08487 | -3.1789  | -0.86495 |
| H | 12.14162 | -4.09352 | -0.87746 |
| H | 14.82136 | 0.096345 | -0.40746 |
| H | 9.503257 | 1.578864 | -0.27806 |
| C | -9.70908 | -0.83241 | -0.52145 |
| H | -9.87015 | -1.90596 | -0.46682 |
| C | -10.859  | -0.08434 | -0.61615 |
| C | -10.9824 | 1.383968 | -0.53393 |
| C | -12.203  | -0.63736 | -0.68917 |
| C | -13.1508 | 0.477908 | -0.5091  |
| C | -14.5387 | 0.514567 | -0.41843 |
| C | -15.1402 | 1.747419 | -0.26781 |
| C | -14.4032 | 2.929847 | -0.2161  |
| C | -13.0278 | 2.904616 | -0.30357 |
| C | -12.428  | 1.669216 | -0.44398 |
| H | -15.1755 | -0.35997 | -0.44962 |
| H | -12.4495 | 3.82134  | -0.26104 |
| O | -10.109  | 2.226665 | -0.51799 |
| O | 9.781874 | -2.54368 | -0.50363 |
| C | 12.20566 | 1.604571 | 0.20303  |
| C | -12.5749 | -1.93538 | -0.94987 |
| C | 11.28546 | 2.618125 | 0.587153 |
| N | 10.57124 | 3.465423 | 0.916487 |
| C | 13.55688 | 2.039905 | 0.263672 |
| N | 14.6429  | 2.430894 | 0.320201 |

|   |          |          |          |
|---|----------|----------|----------|
| C | 4.036349 | 3.082747 | -0.00092 |
| C | 4.65477  | 4.178332 | -0.59004 |
| C | 4.088319 | 2.954625 | 1.387626 |
| C | 5.32779  | 5.111276 | 0.189403 |
| H | 4.633854 | 4.311729 | -1.66682 |
| C | 4.753765 | 3.88821  | 2.158825 |
| H | 3.606006 | 2.104607 | 1.863404 |
| C | 5.399735 | 4.977943 | 1.571048 |
| H | 5.8128   | 5.957753 | -0.29029 |
| H | 4.786107 | 3.76995  | 3.239128 |
| C | -3.42198 | -2.38889 | 1.667203 |
| C | -2.37149 | -3.19529 | 2.104847 |
| C | -4.23683 | -1.78609 | 2.617269 |
| C | -2.1436  | -3.38334 | 3.456562 |
| H | -1.72298 | -3.67539 | 1.376854 |
| C | -4.00817 | -1.98561 | 3.972854 |
| H | -5.06089 | -1.14865 | 2.30732  |
| C | -2.95827 | -2.78131 | 4.416267 |
| H | -1.31616 | -4.01095 | 3.779812 |
| H | -4.65819 | -1.50651 | 4.700814 |
| C | -11.6643 | -2.98262 | -1.25796 |
| N | -10.9572 | -3.85775 | -1.52303 |
| C | -13.9306 | -2.35962 | -0.98663 |
| N | -15.0206 | -2.74187 | -1.02132 |
| C | -2.68865 | -2.97665 | 5.87564  |
| H | -3.53773 | -2.65888 | 6.486271 |
| H | -2.47574 | -4.02578 | 6.103698 |
| H | -1.81519 | -2.39643 | 6.194681 |
| C | 6.174512 | 5.950267 | 2.403571 |
| H | 6.248194 | 6.926272 | 1.916429 |
| H | 5.718151 | 6.08846  | 3.387933 |
| H | 7.196616 | 5.588656 | 2.567411 |
| F | 16.12922 | -2.05326 | -0.84176 |
| F | 14.7488  | -4.30452 | -1.08274 |
| F | -16.4597 | 1.827201 | -0.16808 |
| F | -15.0549 | 4.07481  | -0.07666 |
| C | 3.240885 | 2.275247 | -2.28742 |
| H | 2.703483 | 1.456597 | -2.77478 |
| H | 2.685941 | 3.204618 | -2.44447 |
| H | 4.223795 | 2.356099 | -2.76146 |
| C | -4.30878 | -3.50886 | -0.38705 |
| H | -5.23312 | -3.74543 | 0.147711 |
| H | -4.52277 | -3.39633 | -1.45393 |

---

|   |          |          |          |
|---|----------|----------|----------|
| H | -3.62133 | -4.34698 | -0.24692 |
|---|----------|----------|----------|

---

**Table S2:** Cartesian coordinates of **TPD1**.

---

| <b>Atom</b> | <b>X-axis</b> | <b>Y-axis</b> | <b>Z-axis</b> |
|-------------|---------------|---------------|---------------|
| C           | 2.548384      | 0.705207      | -0.04115      |
| C           | 2.005199      | -0.47588      | -0.49857      |
| C           | 4.019841      | -1.67593      | -0.19488      |
| C           | 4.720782      | -0.3371       | -0.18365      |
| C           | 3.969964      | 0.806071      | -0.01607      |
| C           | 6.097042      | -0.02626      | -0.2599       |
| C           | 6.374456      | 1.328517      | -0.13648      |
| S           | 7.568667      | -0.93697      | -0.41283      |
| C           | 7.746843      | 1.648489      | -0.16265      |
| C           | 8.529341      | 0.536299      | -0.31152      |
| H           | 8.156428      | 2.646812      | -0.06544      |
| C           | 0.604205      | -0.42086      | -0.57159      |
| C           | 0.099928      | 0.813892      | -0.18909      |
| S           | -0.62855      | -1.53232      | -1.0754       |
| C           | -1.29948      | 0.879952      | -0.28921      |
| C           | -1.84096      | -0.30923      | -0.74724      |
| S           | 4.921733      | 2.264705      | 0.05334       |
| S           | 1.341966      | 1.920774      | 0.310766      |
| C           | -3.25216      | -0.42132      | -0.77772      |
| C           | -5.65814      | -0.95761      | -0.76186      |
| C           | -5.38286      | 0.405961      | -0.5689       |
| S           | -4.18738      | -1.88307      | -0.94412      |
| S           | -6.83522      | 1.305885      | -0.37004      |
| C           | -4.01662      | 0.715546      | -0.58189      |
| C           | -7.00262      | -1.29145      | -0.74578      |
| H           | -7.42264      | -2.28033      | -0.86532      |
| C           | -7.8114       | -0.17364      | -0.54619      |
| O           | 2.749912      | -1.52431      | -0.89133      |
| O           | -2.02483      | 1.941347      | 0.080655      |
| C           | -3.35944      | 2.076713      | -0.51226      |
| C           | -9.19993      | 0.010958      | -0.41396      |
| H           | -9.45416      | 1.050497      | -0.2225       |
| C           | -10.2816      | -0.83723      | -0.49515      |
| C           | -10.2799      | -2.25605      | -0.90215      |
| C           | -11.6649      | -0.43588      | -0.30009      |
| C           | -12.5194      | -1.5639       | -0.72213      |
| C           | -13.8994      | -1.71106      | -0.82028      |
| C           | -14.4069      | -2.9362       | -1.24087      |
| C           | -13.5723      | -4.00455      | -1.55478      |

---

|   |          |          |          |
|---|----------|----------|----------|
| C | -12.1935 | -3.86261 | -1.46141 |
| C | -11.6956 | -2.64324 | -1.05145 |
| H | -14.5854 | -0.90713 | -0.58928 |
| H | -11.5138 | -4.67405 | -1.70221 |
| O | -9.33383 | -2.99128 | -1.10523 |
| C | -12.1385 | 0.736548 | 0.24617  |
| C | 3.744474 | -2.18468 | 1.215156 |
| C | 2.684093 | -3.05814 | 1.445199 |
| C | 4.576831 | -1.8553  | 2.27899  |
| C | 2.460859 | -3.5783  | 2.709565 |
| H | 2.021686 | -3.32655 | 0.626476 |
| C | 4.354077 | -2.38713 | 3.541059 |
| H | 5.410315 | -1.17382 | 2.126268 |
| C | 3.290248 | -3.25207 | 3.781026 |
| H | 1.623307 | -4.25305 | 2.871173 |
| H | 5.018748 | -2.12    | 4.35924  |
| C | -4.12467 | 2.985048 | 0.425017 |
| C | -4.79212 | 4.120621 | -0.01539 |
| C | -4.22127 | 2.634699 | 1.772515 |
| C | -5.55908 | 4.874293 | 0.864774 |
| H | -4.7336  | 4.424707 | -1.05533 |
| C | -4.98011 | 3.391417 | 2.645269 |
| H | -3.69757 | 1.75312  | 2.132822 |
| C | -5.67502 | 4.519039 | 2.203393 |
| H | -6.0803  | 5.75593  | 0.500363 |
| H | -5.04602 | 3.102771 | 3.691494 |
| C | -11.3126 | 1.759003 | 0.78853  |
| N | -10.6778 | 2.607294 | 1.251786 |
| C | -13.5224 | 1.030802 | 0.376956 |
| N | -14.6357 | 1.316307 | 0.500437 |
| C | -6.54105 | 5.30156  | 3.139925 |
| H | -6.10256 | 5.355208 | 4.14073  |
| H | -6.70283 | 6.320521 | 2.778405 |
| H | -7.52542 | 4.829581 | 3.242304 |
| C | 3.026674 | -3.79353 | 5.15179  |
| H | 2.322169 | -3.15465 | 5.697247 |
| H | 2.587683 | -4.79458 | 5.108953 |
| H | 3.943804 | -3.84584 | 5.745181 |
| C | 9.977822 | 0.503375 | -0.48107 |
| C | 10.76565 | -0.54905 | 0.085191 |
| C | 10.60353 | 1.488638 | -1.19624 |
| C | 12.02061 | 1.512931 | -1.399   |
| H | 10.00714 | 2.269314 | -1.65997 |

|   |          |          |          |
|---|----------|----------|----------|
| C | 12.78317 | 0.461559 | -0.85565 |
| C | 12.7059  | 2.496528 | -2.12058 |
| H | 12.14479 | 3.318243 | -2.55602 |
| C | 14.08258 | 2.422066 | -2.27736 |
| H | 14.59633 | 3.195799 | -2.83932 |
| C | 10.53328 | -1.67301 | 0.87611  |
| H | 9.570898 | -1.98304 | 1.255772 |
| C | 11.75757 | -2.3128  | 1.10212  |
| H | 11.91986 | -3.21321 | 1.676939 |
| C | 12.75416 | -1.58538 | 0.460697 |
| C | 14.16205 | -1.68513 | 0.313876 |
| H | 14.67176 | -2.52178 | 0.779514 |
| C | 14.84829 | -0.74939 | -0.38997 |
| H | 15.92596 | -0.82526 | -0.49966 |
| C | 14.18078 | 0.367715 | -1.00148 |
| C | 14.81642 | 1.37877  | -1.72955 |
| H | 15.894   | 1.335425 | -1.85911 |
| N | 12.13057 | -0.51087 | -0.15075 |
| H | -14.0035 | -4.94688 | -1.87602 |
| H | -15.4819 | -3.05745 | -1.32486 |
| C | 4.761872 | -2.72272 | -1.00108 |
| H | 4.987939 | -2.35018 | -2.00461 |
| H | 5.692034 | -3.00475 | -0.49941 |
| H | 4.142722 | -3.62024 | -1.08224 |
| C | -3.17704 | 2.630385 | -1.91376 |
| H | -4.14391 | 2.721178 | -2.41813 |
| H | -2.69252 | 3.610675 | -1.88283 |
| H | -2.55638 | 1.947967 | -2.50133 |

**Table S3:** Cartesian coordinates of **TPD2**.

| <b>Atom</b> | <b>X-axis</b> | <b>Y-axis</b> | <b>Z-axis</b> |
|-------------|---------------|---------------|---------------|
| C           | 3.125793      | 0.793747      | -0.25946      |
| C           | 2.513309      | -0.42965      | -0.43275      |
| C           | 4.47695       | -1.63599      | 0.095247      |
| C           | 5.238881      | -0.3694       | -0.21123      |
| C           | 4.550886      | 0.821835      | -0.28813      |
| C           | 6.627466      | -0.15865      | -0.35906      |
| C           | 6.977312      | 1.174408      | -0.53402      |
| S           | 8.047209      | -1.15795      | -0.30292      |
| C           | 8.364721      | 1.406314      | -0.62504      |
| C           | 9.084921      | 0.247987      | -0.52154      |
| H           | 8.827578      | 2.378574      | -0.74387      |
| C           | 1.115659      | -0.31654      | -0.48757      |

|   |          |          |          |
|---|----------|----------|----------|
| C | 0.680513 | 0.995605 | -0.36389 |
| S | -0.17924 | -1.4468  | -0.71918 |
| C | -0.71724 | 1.109455 | -0.43547 |
| C | -1.32467 | -0.12239 | -0.62817 |
| S | 5.578598 | 2.206994 | -0.54271 |
| S | 1.989905 | 2.117774 | -0.14624 |
| C | -2.73547 | -0.17457 | -0.59263 |
| C | -5.15626 | -0.59793 | -0.43276 |
| C | -4.82374 | 0.76946  | -0.47603 |
| S | -3.7281  | -1.60262 | -0.48522 |
| S | -6.23511 | 1.750726 | -0.39838 |
| C | -3.45132 | 1.012414 | -0.57812 |
| C | -6.50653 | -0.86897 | -0.34771 |
| H | -6.96113 | -1.84811 | -0.30599 |
| C | -7.27332 | 0.300007 | -0.32394 |
| O | 3.193114 | -1.57813 | -0.59433 |
| O | -1.38005 | 2.255924 | -0.26065 |
| C | -2.7517  | 2.337239 | -0.77826 |
| C | -8.64633 | 0.544084 | -0.2041  |
| H | -8.87055 | 1.60622  | -0.14168 |
| C | -9.75682 | -0.28171 | -0.17842 |
| C | -9.79785 | -1.72339 | -0.47082 |
| C | -11.1187 | 0.174604 | 0.008031 |
| C | -12.0189 | -0.96119 | -0.29837 |
| C | -13.4048 | -1.07403 | -0.34755 |
| C | -13.9603 | -2.30707 | -0.66276 |
| C | -13.1408 | -3.39604 | -0.91778 |
| C | -11.7583 | -3.31315 | -0.87525 |
| C | -11.2296 | -2.08173 | -0.56515 |
| H | -14.0644 | -0.23906 | -0.15663 |
| H | -11.1273 | -4.17037 | -1.07836 |
| O | -8.88475 | -2.50643 | -0.63629 |
| C | -11.5538 | 1.401118 | 0.459635 |
| C | 4.218878 | -1.79528 | 1.589031 |
| C | 3.186902 | -2.62594 | 2.024214 |
| C | 5.023952 | -1.18252 | 2.541407 |
| C | 2.965657 | -2.82734 | 3.375469 |
| H | 2.548189 | -3.11543 | 1.293855 |
| C | 4.802622 | -1.39533 | 3.896183 |
| H | 5.833253 | -0.52612 | 2.231421 |
| C | 3.769652 | -2.2147  | 4.337082 |
| H | 2.151776 | -3.47373 | 3.696447 |
| H | 5.444414 | -0.90782 | 4.626052 |

|   |          |          |          |
|---|----------|----------|----------|
| C | -3.42856 | 3.412175 | 0.04347  |
| C | -4.0937  | 4.48835  | -0.52898 |
| C | -3.44583 | 3.279288 | 1.433213 |
| C | -4.77634 | 5.399919 | 0.268306 |
| H | -4.1013  | 4.624307 | -1.60559 |
| C | -4.11981 | 4.191417 | 2.221301 |
| H | -2.92701 | 2.443196 | 1.895006 |
| C | -4.80912 | 5.264363 | 1.650332 |
| H | -5.29686 | 6.232535 | -0.19799 |
| H | -4.12408 | 4.071485 | 3.302012 |
| C | -10.6899 | 2.443322 | 0.893678 |
| N | -10.0252 | 3.311745 | 1.268779 |
| C | -12.9265 | 1.744109 | 0.587755 |
| N | -14.0301 | 2.067364 | 0.703848 |
| C | -5.57653 | 6.219255 | 2.509347 |
| H | -5.00366 | 6.506092 | 3.396625 |
| H | -5.84145 | 7.127468 | 1.962025 |
| H | -6.50794 | 5.761593 | 2.862156 |
| C | 3.506344 | -2.42243 | 5.796127 |
| H | 2.63181  | -1.84825 | 6.123252 |
| H | 3.298952 | -3.47412 | 6.017417 |
| H | 4.35632  | -2.10529 | 6.406014 |
| C | 10.52978 | 0.103516 | -0.66169 |
| C | 11.26121 | -0.82487 | 0.146092 |
| C | 11.20708 | 0.864101 | -1.57579 |
| C | 12.62453 | 0.772895 | -1.756   |
| H | 10.65309 | 1.545164 | -2.21578 |
| C | 13.33173 | -0.15598 | -0.96888 |
| C | 13.36198 | 1.527256 | -2.6751  |
| H | 12.84493 | 2.249683 | -3.29996 |
| C | 14.73434 | 1.354883 | -2.78567 |
| H | 15.28859 | 1.950964 | -3.50396 |
| C | 10.97026 | -1.71964 | 1.174743 |
| H | 9.992219 | -1.88889 | 1.600164 |
| C | 12.16077 | -2.34217 | 1.566947 |
| H | 12.2756  | -3.0884  | 2.339839 |
| C | 13.19541 | -1.8318  | 0.790997 |
| C | 14.59805 | -2.02585 | 0.698015 |
| H | 15.06383 | -2.7507  | 1.356852 |
| C | 15.33306 | -1.31448 | -0.19403 |
| H | 16.4067  | -1.46153 | -0.26362 |
| C | 14.72416 | -0.34452 | -1.06297 |
| C | 15.41313 | 0.436889 | -1.99619 |



|   |          |          |          |
|---|----------|----------|----------|
| H | 16.48821 | 0.316095 | -2.09317 |
| N | 12.62808 | -0.90546 | -0.06799 |
| H | -15.0346 | -2.43297 | -0.71517 |
| N | -13.7651 | -4.69039 | -1.25203 |
| O | -13.0254 | -5.61861 | -1.5004  |
| O | -14.9763 | -4.74824 | -1.25867 |
| C | 5.145489 | -2.87386 | -0.46689 |
| H | 5.360092 | -2.74834 | -1.53225 |
| H | 6.075694 | -3.08064 | 0.07004  |
| H | 4.4863   | -3.73571 | -0.33418 |
| C | -2.65071 | 2.643113 | -2.26143 |
| H | -3.64579 | 2.687929 | -2.71457 |
| H | -2.13472 | 3.593371 | -2.42602 |
| H | -2.09279 | 1.847656 | -2.76376 |

**Table S4:** Cartesian coordinates of **TPD3**.

| <b>Atom</b> | <b>X-axis</b> | <b>Y-axis</b> | <b>Z-axis</b> |
|-------------|---------------|---------------|---------------|
| C           | 3.328904      | -0.86055      | -0.79908      |
| C           | 2.752538      | 0.314336      | -0.36175      |
| C           | 4.786904      | 1.561824      | -0.54645      |
| C           | 5.479008      | 0.217456      | -0.61734      |
| C           | 4.751567      | -0.93217      | -0.82307      |
| C           | 6.862332      | -0.0586       | -0.58941      |
| C           | 7.172722      | -1.39808      | -0.77839      |
| S           | 8.303185      | 0.887372      | -0.38619      |
| C           | 8.553666      | -1.67999      | -0.76996      |
| C           | 9.302885      | -0.55213      | -0.56934      |
| H           | 8.992014      | -2.65997      | -0.91588      |
| C           | 1.352228      | 0.220052      | -0.30399      |
| C           | 0.884821      | -1.02968      | -0.6893       |
| S           | 0.085112      | 1.296314      | 0.193946      |
| C           | -0.50943      | -1.13225      | -0.60339      |
| C           | -1.09125      | 0.039531      | -0.14147      |
| S           | 5.739058      | -2.36257      | -0.98262      |
| S           | 2.160862      | -2.1079       | -1.1642       |
| C           | -2.50094      | 0.114478      | -0.16113      |
| C           | -4.91252      | 0.591104      | -0.29217      |
| C           | -4.59906      | -0.77606      | -0.43601      |
| S           | -3.47262      | 1.556548      | -0.08175      |
| S           | -6.03155      | -1.71177      | -0.63064      |
| C           | -3.23201      | -1.05307      | -0.35196      |
| C           | -6.25805      | 0.893701      | -0.34719      |
| H           | -6.69936      | 1.87746       | -0.26512      |

|   |          |          |          |
|---|----------|----------|----------|
| C | -7.04304 | -0.24931 | -0.52773 |
| O | 3.451818 | 1.392313 | 0.030101 |
| O | -1.21412 | -2.19893 | -0.99286 |
| C | -2.50693 | -2.37509 | -0.33527 |
| C | -8.41878 | -0.4486  | -0.68191 |
| H | -8.67863 | -1.49066 | -0.8579  |
| C | -9.50586 | 0.402191 | -0.61008 |
| C | -9.53811 | 1.802252 | -0.18373 |
| C | -10.8735 | -0.00044 | -0.88121 |
| C | -11.7557 | 1.001219 | -0.23386 |
| C | -13.0883 | 1.036816 | 0.15355  |
| C | -13.5993 | 2.218922 | 0.691971 |
| C | -12.8291 | 3.353997 | 0.856097 |
| C | -11.4765 | 3.300652 | 0.552512 |
| C | -10.9705 | 2.125947 | 0.045177 |
| H | -10.8179 | 4.142505 | 0.735735 |
| O | -8.62881 | 2.582456 | 0.00962  |
| C | -11.2687 | -0.97004 | -1.76858 |
| C | 5.512102 | 2.486497 | 0.407816 |
| C | 6.16512  | 3.635816 | -0.01584 |
| C | 5.577114 | 2.142271 | 1.759283 |
| C | 6.877941 | 4.417398 | 0.886854 |
| H | 6.139574 | 3.9304   | -1.05988 |
| C | 6.27959  | 2.926457 | 2.653771 |
| H | 5.072794 | 1.243711 | 2.104649 |
| C | 6.947567 | 4.078605 | 2.232111 |
| H | 7.390604 | 5.308695 | 0.533911 |
| H | 6.322223 | 2.641961 | 3.702567 |
| C | -2.25433 | -2.87303 | 1.082735 |
| C | -1.23239 | -3.79273 | 1.315363 |
| C | -3.06177 | -2.49361 | 2.147552 |
| C | -1.02373 | -4.30812 | 2.582478 |
| H | -0.59171 | -4.10298 | 0.494196 |
| C | -2.85364 | -3.02176 | 3.414857 |
| H | -3.86476 | -1.77673 | 1.99607  |
| C | -1.83074 | -3.93245 | 3.656374 |
| H | -0.21836 | -5.02053 | 2.746015 |
| H | -3.49864 | -2.71489 | 4.234551 |
| C | -10.3379 | -1.77337 | -2.4861  |
| N | -9.60869 | -2.43614 | -3.08929 |
| C | -12.6047 | -1.14646 | -2.21627 |
| N | -13.6619 | -1.29069 | -2.65861 |
| C | -1.58277 | -4.47888 | 5.027811 |

|   |          |          |          |
|---|----------|----------|----------|
| H | -2.45604 | -4.3529  | 5.673144 |
| H | -1.33155 | -5.54334 | 4.99347  |
| H | -0.74133 | -3.9661  | 5.508204 |
| C | 7.699519 | 4.923102 | 3.212486 |
| H | 8.341346 | 5.648954 | 2.706749 |
| H | 7.011506 | 5.479968 | 3.858815 |
| H | 8.325853 | 4.308663 | 3.866892 |
| C | 10.75199 | -0.48534 | -0.41204 |
| C | 11.50198 | 0.616273 | -0.93488 |
| C | 11.41478 | -1.48371 | 0.249846 |
| C | 12.83382 | -1.47273 | 0.441065 |
| H | 10.84719 | -2.30402 | 0.680204 |
| C | 13.55799 | -0.37192 | -0.05554 |
| C | 13.55632 | -2.46738 | 1.109022 |
| H | 13.02565 | -3.32738 | 1.507171 |
| C | 14.93116 | -2.35536 | 1.260835 |
| H | 15.474   | -3.13829 | 1.781139 |
| C | 11.22854 | 1.766199 | -1.67345 |
| H | 10.25438 | 2.060528 | -2.03457 |
| C | 12.4301  | 2.45444  | -1.87758 |
| H | 12.5595  | 3.384719 | -2.41176 |
| C | 13.45374 | 1.731686 | -1.27469 |
| C | 14.85847 | 1.870842 | -1.13092 |
| H | 15.33733 | 2.744588 | -1.55989 |
| C | 15.57972 | 0.926634 | -0.47498 |
| H | 16.65511 | 1.032286 | -0.3676  |
| C | 14.95295 | -0.23933 | 0.086442 |
| C | 15.6264  | -1.26277 | 0.760832 |
| H | 16.70291 | -1.19037 | 0.886085 |
| N | 12.86908 | 0.61106  | -0.70911 |
| H | -13.2871 | 4.24233  | 1.275165 |
| N | -13.9602 | -0.14929 | 0.069096 |
| O | -13.4911 | -1.18357 | 0.487006 |
| O | -15.0563 | 0.000223 | -0.4105  |
| N | -14.9633 | 2.274794 | 1.256981 |
| O | -15.6134 | 3.263396 | 1.012807 |
| O | -15.301  | 1.351551 | 1.961456 |
| C | 4.613873 | 2.11979  | -1.94781 |
| H | 4.011356 | 1.429323 | -2.54498 |
| H | 4.112794 | 3.091919 | -1.91883 |
| H | 5.584597 | 2.228708 | -2.44115 |
| C | -3.20316 | -3.43737 | -1.16113 |
| H | -4.13921 | -3.73976 | -0.68247 |

|   |          |          |          |
|---|----------|----------|----------|
| H | -3.41129 | -3.07037 | -2.17046 |
| H | -2.56482 | -4.32232 | -1.22679 |

**Table S5:** Cartesian coordinates of **TPD4**.

| Atom | X-axis   | Y-axis   | Z-axis   |
|------|----------|----------|----------|
| C    | 2.597233 | -0.89426 | -0.83077 |
| C    | 2.00808  | 0.246619 | -0.32894 |
| C    | 4.025134 | 1.531743 | -0.4365  |
| C    | 4.732275 | 0.204002 | -0.59667 |
| C    | 4.021949 | -0.94305 | -0.8647  |
| C    | 6.120315 | -0.04787 | -0.59747 |
| C    | 6.453828 | -1.36719 | -0.86921 |
| S    | 7.543939 | 0.914465 | -0.35568 |
| C    | 7.8409   | -1.62025 | -0.89426 |
| C    | 8.569841 | -0.49042 | -0.63829 |
| H    | 8.297056 | -2.5805  | -1.10352 |
| C    | 0.608729 | 0.136209 | -0.27796 |
| C    | 0.150851 | -1.09329 | -0.73138 |
| S    | -0.66424 | 1.177273 | 0.274206 |
| C    | -1.24533 | -1.20603 | -0.65547 |
| C    | -1.83152 | -0.06454 | -0.13436 |
| S    | 5.03386  | -2.34337 | -1.11743 |
| S    | 1.438674 | -2.13181 | -1.26283 |
| C    | -3.24393 | 0.004764 | -0.14244 |
| C    | -5.65704 | 0.477433 | -0.21478 |
| C    | -5.34364 | -0.8761  | -0.43629 |
| S    | -4.21886 | 1.436327 | 0.027038 |
| S    | -6.78068 | -1.80203 | -0.64632 |
| C    | -3.97082 | -1.15149 | -0.38812 |
| C    | -7.00658 | 0.779831 | -0.22192 |
| H    | -7.44587 | 1.756277 | -0.0769  |
| C    | -7.79415 | -0.34916 | -0.44479 |
| O    | 2.691428 | 1.310614 | 0.124404 |
| O    | -1.94922 | -2.25362 | -1.10058 |
| C    | -3.23897 | -2.46883 | -0.44717 |
| C    | -9.17865 | -0.56388 | -0.55568 |
| H    | -9.41048 | -1.60692 | -0.75228 |
| C    | -10.2796 | 0.26111  | -0.45403 |
| C    | -10.288  | 1.695849 | -0.11705 |
| C    | -11.6618 | -0.16533 | -0.61185 |
| C    | -12.5239 | 0.992875 | -0.30036 |
| C    | -13.9058 | 1.15421  | -0.2492  |
| C    | -14.4239 | 2.401253 | 0.074261 |

|   |          |          |          |
|---|----------|----------|----------|
| C | -13.5794 | 3.473332 | 0.340361 |
| C | -12.2003 | 3.336006 | 0.297544 |
| C | -11.7082 | 2.089842 | -0.02167 |
| H | -14.5945 | 0.344598 | -0.44865 |
| H | -11.5312 | 4.164333 | 0.505557 |
| O | -9.35333 | 2.449637 | 0.066333 |
| C | -12.1412 | -1.3932  | -1.01218 |
| C | 4.738607 | 2.392983 | 0.5831   |
| C | 5.344438 | 3.598824 | 0.259162 |
| C | 4.837879 | 1.928036 | 1.896069 |
| C | 6.041938 | 4.320122 | 1.222606 |
| H | 5.292347 | 3.988737 | -0.75241 |
| C | 5.527066 | 2.649709 | 2.850024 |
| H | 4.371312 | 0.983112 | 2.162345 |
| C | 6.145412 | 3.86121  | 2.529079 |
| H | 6.514221 | 5.260161 | 0.948571 |
| H | 5.597313 | 2.270786 | 3.867119 |
| C | -2.97833 | -3.04056 | 0.941354 |
| C | -1.96639 | -3.98499 | 1.114644 |
| C | -3.76357 | -2.70047 | 2.035263 |
| C | -1.74936 | -4.56616 | 2.351063 |
| H | -1.33904 | -4.26087 | 0.271096 |
| C | -3.54624 | -3.29393 | 3.272492 |
| H | -4.55528 | -1.9627  | 1.931052 |
| C | -2.53703 | -4.23255 | 3.453385 |
| H | -0.9522  | -5.2968  | 2.468995 |
| H | -4.17322 | -3.01623 | 4.116177 |
| C | -11.329  | -2.49982 | -1.37925 |
| N | -10.7085 | -3.42405 | -1.69161 |
| C | -13.5267 | -1.6866  | -1.12922 |
| N | -14.6409 | -1.9742  | -1.23845 |
| C | -2.28293 | -4.86002 | 4.788595 |
| H | -3.09001 | -4.64402 | 5.493294 |
| H | -2.18447 | -5.94698 | 4.703658 |
| H | -1.34974 | -4.48823 | 5.226834 |
| C | 6.884098 | 4.634627 | 3.575796 |
| H | 7.415413 | 5.487138 | 3.145162 |
| H | 6.196825 | 5.018186 | 4.3383   |
| H | 7.613378 | 4.002948 | 4.093321 |
| C | 10.01929 | -0.39599 | -0.49874 |
| C | 10.73102 | 0.74738  | -0.98389 |
| C | 10.71846 | -1.4027  | 0.110616 |
| C | 12.13929 | -1.3579  | 0.286291 |

|    |          |          |          |
|----|----------|----------|----------|
| H  | 10.17974 | -2.25649 | 0.512191 |
| C  | 12.8251  | -0.21601 | -0.17054 |
| C  | 12.89881 | -2.35658 | 0.905806 |
| H  | 12.39864 | -3.24812 | 1.272938 |
| C  | 14.27101 | -2.20838 | 1.050557 |
| H  | 14.84237 | -2.99477 | 1.533807 |
| C  | 10.41493 | 1.918989 | -1.66978 |
| H  | 9.427209 | 2.199349 | -2.00424 |
| C  | 11.59353 | 2.649518 | -1.85972 |
| H  | 11.68941 | 3.605018 | -2.35505 |
| C  | 12.6453  | 1.93216  | -1.30021 |
| C  | 14.0467  | 2.107274 | -1.16501 |
| H  | 14.49454 | 3.011941 | -1.56216 |
| C  | 14.8026  | 1.159707 | -0.55436 |
| H  | 15.87541 | 1.293312 | -0.45235 |
| C  | 14.21686 | -0.04661 | -0.03574 |
| C  | 14.92775 | -1.07529 | 0.59044  |
| H  | 16.00275 | -0.97509 | 0.709453 |
| N  | 12.10044 | 0.772456 | -0.77542 |
| H  | -15.4974 | 2.545442 | 0.121423 |
| Cl | -14.2731 | 5.019768 | 0.736546 |
| C  | -3.93475 | -3.4878  | -1.32635 |
| H  | -4.86937 | -3.81754 | -0.86351 |
| H  | -4.14597 | -3.06763 | -2.31404 |
| H  | -3.29444 | -4.36626 | -1.44034 |
| C  | 3.846888 | 2.182677 | -1.79608 |
| H  | 3.254328 | 1.526315 | -2.44019 |
| H  | 3.330992 | 3.14279  | -1.70131 |
| H  | 4.816287 | 2.339823 | -2.27912 |

**Table S6:** Cartesian coordinates of **TPD5**.

| <b>Atom</b> | <b>X-axis</b> | <b>Y-axis</b> | <b>Z-axis</b> |
|-------------|---------------|---------------|---------------|
| C           | -3.17464      | 1.019974      | 0.059732      |
| C           | -2.57935      | -0.22296      | 0.010696      |
| C           | -4.58769      | -1.33591      | -0.67015      |
| C           | -5.30364      | -0.07455      | -0.23796      |
| C           | -4.59888      | 1.074012      | 0.037521      |
| C           | -6.69366      | 0.151765      | -0.14771      |
| C           | -7.03189      | 1.455912      | 0.184681      |
| S           | -8.11514      | -0.81655      | -0.38047      |
| C           | -8.41989      | 1.696969      | 0.246377      |
| C           | -9.14527      | 0.571822      | -0.03725      |
| H           | -8.87872      | 2.653266      | 0.467347      |

|   |          |          |          |
|---|----------|----------|----------|
| C | -1.18068 | -0.13858 | 0.11564  |
| C | -0.73315 | 1.167004 | 0.256955 |
| S | 0.103826 | -1.30448 | 0.147549 |
| C | 0.662595 | 1.25048  | 0.378902 |
| C | 1.260788 | 0.000708 | 0.334918 |
| S | -5.61619 | 2.441534 | 0.414813 |
| S | -2.02571 | 2.326644 | 0.229374 |
| C | 2.673311 | -0.05005 | 0.296843 |
| C | 5.095118 | -0.43367 | 0.039772 |
| C | 4.764479 | 0.892096 | 0.375726 |
| S | 3.663724 | -1.42395 | -0.11555 |
| S | 6.175158 | 1.868913 | 0.496018 |
| C | 3.39195  | 1.111193 | 0.532618 |
| C | 6.446867 | -0.67664 | -0.11849 |
| H | 6.904901 | -1.62112 | -0.37651 |
| C | 7.209891 | 0.472926 | 0.098991 |
| O | -3.25937 | -1.37992 | -0.05715 |
| O | 1.333416 | 2.404148 | 0.445505 |
| C | 2.690628 | 2.366629 | 1.000428 |
| C | 8.581576 | 0.747862 | 0.014109 |
| H | 8.800186 | 1.802217 | 0.167453 |
| C | 9.695121 | -0.04339 | -0.18837 |
| C | 9.75869  | -1.51473 | -0.17556 |
| C | 11.05091 | 0.460181 | -0.28175 |
| C | 11.9658  | -0.69509 | -0.15839 |
| C | 13.34858 | -0.79019 | -0.08119 |
| C | 13.92425 | -2.05232 | 0.030501 |
| C | 13.14128 | -3.19872 | 0.05526  |
| C | 11.75382 | -3.11346 | -0.02293 |
| C | 11.19604 | -1.86056 | -0.12157 |
| H | 13.99144 | 0.079275 | -0.09239 |
| H | 11.12355 | -3.99804 | -0.00091 |
| O | 8.853761 | -2.32473 | -0.17602 |
| C | 11.45916 | 1.752386 | -0.52597 |
| C | -5.30767 | -2.55655 | -0.13794 |
| C | -5.92727 | -3.48429 | -0.96348 |
| C | -5.40785 | -2.72213 | 1.245291 |
| C | -6.64262 | -4.54644 | -0.41976 |
| H | -5.87344 | -3.38669 | -2.04293 |
| C | -6.11649 | -3.77947 | 1.78001  |
| H | -4.92662 | -2.00275 | 1.902673 |
| C | -6.75311 | -4.71016 | 0.954532 |
| H | -7.12636 | -5.25953 | -1.0825  |

|   |          |          |          |
|---|----------|----------|----------|
| H | -6.18859 | -3.89072 | 2.859505 |
| C | 3.384475 | 3.591921 | 0.446606 |
| C | 4.038338 | 4.51288  | 1.254638 |
| C | 3.4326   | 3.765826 | -0.93763 |
| C | 4.745161 | 5.568724 | 0.690675 |
| H | 4.018845 | 4.413151 | 2.334948 |
| C | 4.13318  | 4.819096 | -1.49292 |
| H | 2.918875 | 3.056539 | -1.58138 |
| C | 4.815998 | 5.733083 | -0.68715 |
| H | 5.256848 | 6.275666 | 1.338833 |
| H | 4.164302 | 4.936018 | -2.57349 |
| C | 10.5705  | 2.827391 | -0.80215 |
| N | 9.881624 | 3.72385  | -1.04412 |
| C | 12.82492 | 2.138577 | -0.58532 |
| N | 13.92329 | 2.494518 | -0.63817 |
| C | 5.621385 | 6.836236 | -1.29824 |
| H | 5.112675 | 7.270961 | -2.1639  |
| H | 5.820233 | 7.633904 | -0.57783 |
| H | 6.589574 | 6.459428 | -1.64858 |
| C | -7.5209  | -5.84875 | 1.549408 |
| H | -8.02363 | -6.43972 | 0.779782 |
| H | -6.85983 | -6.51852 | 2.110512 |
| H | -8.27986 | -5.48856 | 2.251963 |
| C | -10.5977 | 0.435565 | -0.00192 |
| C | -11.2809 | -0.36047 | -0.97596 |
| C | -11.3272 | 1.0699   | 0.966789 |
| C | -12.7539 | 0.969105 | 1.046854 |
| H | -10.8111 | 1.648388 | 1.728138 |
| C | -13.4133 | 0.166709 | 0.095291 |
| C | -13.5445 | 1.592907 | 2.018191 |
| H | -13.0648 | 2.214914 | 2.768378 |
| C | -14.9212 | 1.418927 | 2.022085 |
| H | -15.5173 | 1.911967 | 2.783617 |
| C | -10.9289 | -1.1032  | -2.10182 |
| H | -9.92527 | -1.21942 | -2.48309 |
| C | -12.0945 | -1.651   | -2.6496  |
| H | -12.1636 | -2.27876 | -3.52628 |
| C | -13.1738 | -1.24498 | -1.87232 |
| C | -14.5799 | -1.4351  | -1.89252 |
| H | -15.0059 | -2.05399 | -2.67494 |
| C | -15.3667 | -0.84982 | -0.95407 |
| H | -16.4429 | -0.99344 | -0.97115 |
| C | -14.8091 | -0.01935 | 0.078705 |



|   |          |          |          |
|---|----------|----------|----------|
| C | -15.5517 | 0.62829  | 1.070864 |
| H | -16.6308 | 0.504901 | 1.085243 |
| N | -12.6579 | -0.45557 | -0.85826 |
| H | 15.00231 | -2.1399  | 0.100607 |
| C | 13.75729 | -4.55794 | 0.178895 |
| F | 13.43835 | -5.33077 | -0.8658  |
| F | 13.3151  | -5.19077 | 1.272164 |
| F | 15.08653 | -4.51686 | 0.253069 |
| C | 2.557979 | 2.346136 | 2.512273 |
| H | 2.035446 | 3.239206 | 2.867042 |
| H | 1.993832 | 1.461299 | 2.82078  |
| H | 3.544627 | 2.294509 | 2.982772 |
| C | -4.39933 | -1.32474 | -2.17628 |
| H | -3.81584 | -0.446   | -2.46594 |
| H | -3.87143 | -2.2238  | -2.50768 |
| H | -5.367   | -1.26637 | -2.68416 |

**Table S7:** Cartesian coordinates of **TPD6**.

| <b>Atom</b> | <b>X-axis</b> | <b>Y-axis</b> | <b>Z-axis</b> |
|-------------|---------------|---------------|---------------|
| C           | -3.96811      | 0.954459      | 0.138204      |
| C           | -3.39604      | -0.29669      | 0.043655      |
| C           | -5.43152      | -1.35684      | -0.6428       |
| C           | -6.11848      | -0.09181      | -0.17604      |
| C           | -5.39115      | 1.035416      | 0.127122      |
| C           | -7.50354      | 0.160018      | -0.08069      |
| C           | -7.81685      | 1.462258      | 0.281173      |
| S           | -8.94205      | -0.77512      | -0.33914      |
| C           | -9.20018      | 1.729316      | 0.342816      |
| C           | -9.94669      | 0.625397      | 0.030463      |
| H           | -9.641        | 2.689528      | 0.582718      |
| C           | -1.9947       | -0.23979      | 0.126139      |
| C           | -1.52115      | 1.052459      | 0.29988       |
| S           | -0.73054      | -1.4276       | 0.087797      |
| C           | -0.12169      | 1.107882      | 0.393255      |
| C           | 0.452975      | -0.14909      | 0.289858      |
| S           | -6.38172      | 2.413532      | 0.53597       |
| S           | -2.79318      | 2.234788      | 0.330339      |
| C           | 1.863081      | -0.22152      | 0.2108        |
| C           | 4.270768      | -0.63508      | -0.1244       |
| C           | 3.972695      | 0.679074      | 0.277272      |
| S           | 2.81829       | -1.59304      | -0.2847       |
| S           | 5.403862      | 1.625005      | 0.412142      |
| C           | 2.607948      | 0.916745      | 0.47238       |

|   |          |          |          |
|---|----------|----------|----------|
| C | 5.614622 | -0.89189 | -0.33025 |
| H | 6.050193 | -1.82846 | -0.6521  |
| C | 6.401113 | 0.232336 | -0.07384 |
| O | -4.09684 | -1.43957 | -0.04812 |
| O | 0.57057  | 2.247075 | 0.483885 |
| C | 1.943087 | 2.169523 | 0.99641  |
| C | 7.780748 | 0.472473 | -0.16015 |
| H | 8.048084 | 1.498954 | 0.085468 |
| C | 8.855532 | -0.34105 | -0.44331 |
| C | 8.886779 | -1.78985 | -0.65449 |
| C | 10.2321  | 0.122425 | -0.53283 |
| C | 11.11156 | -1.05775 | -0.31783 |
| C | 12.43485 | -1.24684 | 0.098171 |
| C | 12.95979 | -2.55485 | 0.013769 |
| C | 12.16769 | -3.62662 | -0.38258 |
| C | 10.8172  | -3.4561  | -0.63336 |
| C | 10.31721 | -2.17869 | -0.58664 |
| H | 10.16233 | -4.29394 | -0.84703 |
| O | 7.974603 | -2.57512 | -0.81365 |
| C | 10.61444 | 1.337846 | -1.04001 |
| C | -6.16929 | -2.57359 | -0.12642 |
| C | -6.80106 | -3.48277 | -0.9631  |
| C | -6.27093 | -2.75523 | 1.25473  |
| C | -7.53033 | -4.54203 | -0.4323  |
| H | -6.74594 | -3.37229 | -2.04125 |
| C | -6.99362 | -3.80933 | 1.776594 |
| H | -5.78021 | -2.05032 | 1.920849 |
| C | -7.64267 | -4.72131 | 0.939836 |
| H | -8.02351 | -5.24048 | -1.10363 |
| H | -7.06701 | -3.93292 | 2.854676 |
| C | 2.642063 | 3.396132 | 0.452123 |
| C | 3.328928 | 4.290848 | 1.261574 |
| C | 2.656561 | 3.59864  | -0.92915 |
| C | 4.03464  | 5.349773 | 0.701257 |
| H | 3.336455 | 4.168213 | 2.339714 |
| C | 3.356277 | 4.654031 | -1.4805  |
| H | 2.117585 | 2.909346 | -1.57397 |
| C | 4.070821 | 5.542924 | -0.67393 |
| H | 4.572168 | 6.036368 | 1.350383 |
| H | 3.361299 | 4.793195 | -2.55892 |
| C | 9.669166 | 2.326573 | -1.43734 |
| N | 8.928886 | 3.147412 | -1.77405 |
| C | 11.94461 | 1.67496  | -1.40704 |

|   |          |          |          |
|---|----------|----------|----------|
| N | 12.98823 | 1.995368 | -1.78325 |
| C | 4.871205 | 6.649791 | -1.28483 |
| H | 4.328622 | 7.129713 | -2.10498 |
| H | 5.127611 | 7.414199 | -0.54692 |
| H | 5.809028 | 6.264295 | -1.70177 |
| C | -8.42644 | -5.85601 | 1.521081 |
| H | -8.92794 | -6.43766 | 0.743606 |
| H | -7.77691 | -6.53505 | 2.084441 |
| H | -9.18835 | -5.49248 | 2.218784 |
| C | -11.4016 | 0.517096 | 0.054296 |
| C | -12.0935 | -0.25435 | -0.93364 |
| C | -12.1259 | 1.153347 | 1.02588  |
| C | -13.5547 | 1.079008 | 1.095226 |
| H | -11.6042 | 1.712224 | 1.798041 |
| C | -14.2227 | 0.299418 | 0.130734 |
| C | -14.3401 | 1.706809 | 2.068269 |
| H | -13.8539 | 2.311431 | 2.82843  |
| C | -15.7197 | 1.558187 | 2.061555 |
| H | -16.3116 | 2.053943 | 2.824607 |
| C | -11.7483 | -0.9913  | -2.06552 |
| H | -10.745  | -1.12136 | -2.44302 |
| C | -12.9201 | -1.51271 | -2.62546 |
| H | -12.9951 | -2.13012 | -3.50897 |
| C | -13.9965 | -1.0958  | -1.85002 |
| C | -15.4056 | -1.2606  | -1.88058 |
| H | -15.8376 | -1.86362 | -2.672   |
| C | -16.1875 | -0.67074 | -0.94102 |
| H | -17.266  | -0.79453 | -0.9662  |
| C | -15.6214 | 0.138881 | 0.103615 |
| C | -16.3584 | 0.789451 | 1.097957 |
| H | -17.4396 | 0.685603 | 1.104252 |
| N | -13.4726 | -0.32612 | -0.82486 |
| H | 12.60935 | -4.61359 | -0.44131 |
| C | 13.18345 | -0.16727 | 0.856713 |
| C | 14.37586 | -2.93217 | 0.398309 |
| F | 14.19315 | 0.375331 | 0.191966 |
| F | 12.3623  | 0.821452 | 1.217959 |
| F | 13.6776  | -0.67752 | 1.989718 |
| F | 14.4512  | -3.28686 | 1.683234 |
| F | 15.25968 | -1.96349 | 0.189015 |
| F | 14.78712 | -3.98528 | -0.3144  |
| C | 1.855415 | 2.110145 | 2.510202 |
| H | 1.3602   | 3.002076 | 2.904841 |

|   |          |          |          |
|---|----------|----------|----------|
| H | 1.284347 | 1.227003 | 2.811064 |
| H | 2.854563 | 2.027985 | 2.949234 |
| C | -5.2601  | -1.3168  | -2.15052 |
| H | -4.66107 | -0.44404 | -2.42651 |
| H | -4.75423 | -2.21876 | -2.50741 |
| H | -6.23107 | -1.22691 | -2.64735 |

**Table S8:** Calculated energies ( $E$ ) and energy gap ( $\Delta E$ ) of HOMO-1/LUMO+1 and HOMO-2/LUMO+2 for **TPR** and **TPD1-TPD6**.

| Compounds   | HOMO-1 | LUMO+1 | $\Delta E$ | HOMO-2 | LUMO+2 | $\Delta E$ |
|-------------|--------|--------|------------|--------|--------|------------|
| <b>TPR</b>  | -6.474 | -3.294 | 3.18       | -6.931 | -2.815 | 4.116      |
| <b>TPD1</b> | -5.617 | -2.607 | 3.01       | -6.289 | -2.155 | 4.134      |
| <b>TPD2</b> | -5.657 | -2.999 | 2.658      | -6.324 | -2.257 | 4.067      |
| <b>TPD3</b> | -5.671 | -3.271 | 2.4        | -6.381 | -2.868 | 3.513      |
| <b>TPD4</b> | -5.623 | -2.723 | 2.9        | -6.381 | -2.186 | 4.195      |
| <b>TPD5</b> | -5.613 | -2.751 | 2.862      | -6.298 | -2.181 | 4.117      |
| <b>TPD6</b> | -5.612 | -2.867 | 2.745      | -6.300 | -2.289 | 4.011      |

**Table S9:** Wavelength, excitation energy and oscillator strength of **TPR** at M06/6-311G(d,p) level in the solvent phase.

| NO | DFT $\lambda$ (nm) | $E$ (eV) | $f_{os}$ | MO contributions                       |
|----|--------------------|----------|----------|----------------------------------------|
| 1  | 749.602            | 1.654    | 3.120    | H→L (95%), H-1→L+1 (3%)                |
| 2  | 602.099            | 2.059    | 0.001    | H→L+1 (97%),                           |
| 3  | 509.364            | 2.434    | 0.138    | H-1→L (15%), H→L+2 (75%), H-1→L+3 (5%) |
| 4  | 508.695            | 2.437    | 0.008    | H-1→L (79%), H→L+2 (15%),              |
| 5  | 487.877            | 2.541    | 0.001    | H→L+3 (88%), H-1→L+2 (6%)              |
| 6  | 454.471            | 2.728    | 0.373    | H-2→L (17%), H-1→L+1 (75%), H→L (4%)   |

MO=molecular orbital, H=HOMO, L=LUMO,  $f_{os}$ = oscillator strength,  $\lambda$  (nm)= wavelength

**Table S10:** Wavelength, excitation energy and oscillator strength of **TPD1** at M06/6-311G(d,p) level in the solvent phase.

| NO | DFT $\lambda$ (nm) | $E$ (eV) | $f_{os}$ | MO contributions                                                                           |
|----|--------------------|----------|----------|--------------------------------------------------------------------------------------------|
| 1  | 719.709            | 1.723    | 2.023    | H-1→L (19%), H→L (77%),                                                                    |
| 2  | 609.229            | 2.035    | 0.180    | H-1→L (76%), H→L (21%),                                                                    |
| 3  | 523.383            | 2.369    | 0.341    | H-1→L+1 (21%), H→L+1 (69%), H-2→L+1 (3%), H→L+2 (3%)                                       |
| 4  | 485.622            | 2.553    | 0.123    | H-2→L (87%), H-3→L (3%), H-1→L (2%), H→L+2 (4%)                                            |
| 5  | 467.865            | 2.650    | 0.054    | H-1→L+1 (36%), H→L+2 (43%), H-2→L (3%), H-2→L+1 (2%), H-1→L+3 (3%), H→L+1 (5%), H→L+3 (3%) |
| 6  | 452.927            | 2.737    | 0.196    | H-1→L+1 (27%), H-1→L+2 (10%), H→L+1 (20%), H→L+2 (38%), H-2→L (2%)                         |

MO=molecular orbital, H=HOMO, L=LUMO,  $f_{os}$ = oscillator strength, wavelength=  $\lambda$  (nm)

**Table S11:** Wavelength, excitation energy and oscillator strength of **TPD2** at M06/6-311G(d,p) level in the solvent phase.

| NO | DFT<br>$\lambda$ (nm) | $E$ (eV) | $f_{os}$ | MO contributions                                                             |
|----|-----------------------|----------|----------|------------------------------------------------------------------------------|
| 1  | 801.294               | 1.547    | 1.556    | H-1→L (20%), H→L (77%),                                                      |
| 2  | 691.105               | 1.794    | 0.274    | H-1→L (76%), H→L (21%),                                                      |
| 3  | 601.369               | 2.062    | 0.630    | H-1→L+1 (25%), H→L+1 (68%),                                                  |
| 4  | 529.011               | 2.344    | 0.078    | H-1→L+1 (62%), H→L+1 (27%), H-2→L (6%)                                       |
| 5  | 526.092               | 2.357    | 0.051    | H-2→L (84%), H-3→L (3%), H-1→L+1 (6%)                                        |
| 6  | 466.790               | 2.656    | 0.315    | H→L+2 (56%), H→L+3 (26%), H-1→L+2 (2%), H-1→L+4 (2%), H→L+1 (2%), H→L+4 (4%) |

MO=molecular orbital, H=HOMO, L=LUMO,  $f_{os}$ = oscillator strength, wavelength=  $\lambda$  (nm)

**Table S12:** Wavelength, excitation energy and oscillator strength of **TPD3** at M06/6-311G(d,p) level in the solvent phase.

| NO | DFT<br>$\lambda$ (nm) | $E$ (eV) | $f_{os}$ | MO contributions                                                  |
|----|-----------------------|----------|----------|-------------------------------------------------------------------|
| 1  | 833.619               | 1.487    | 1.579    | H-1→L (15%), H→L (82%),                                           |
| 2  | 717.958               | 1.727    | 0.432    | H-1→L (81%), H→L (17%),                                           |
| 3  | 644.945               | 1.922    | 0.065    | H-1→L+1 (23%), H→L+1 (73%), H-2→L+1 (3%)                          |
| 4  | 568.266               | 2.182    | 0.047    | H-1→L+1 (67%), H→L+1 (26%), H-2→L+1 (2%)                          |
| 5  | 558.815               | 2.219    | 0.574    | H-2→L (11%), H-1→L+2 (14%), H→L+2 (60%), H-1→L+1 (4%), H→L+4 (2%) |
| 6  | 536.264               | 2.312    | 0.042    | H-2→L (78%), H→L+2 (14%), H-3→L (4%)                              |

MO=molecular orbital, H=HOMO, L=LUMO,  $f_{os}$ = oscillator strength, wavelength=  $\lambda$  (nm)

**Table S13:** Wavelength, excitation energy and oscillator strength of **TPD4** at M06/6-311G(d,p) level in the solvent phase.

| NO | DFT<br>$\lambda$ (nm) | $E$ (eV) | $f_{os}$ | MO contributions                                                            |
|----|-----------------------|----------|----------|-----------------------------------------------------------------------------|
| 1  | 743.177               | 1.668    | 1.980    | H-1→L (18%), H→L (78%),                                                     |
| 2  | 632.218               | 1.961    | 0.257    | H-1→L (78%), H→L (20%),                                                     |
| 3  | 541.203               | 2.291    | 0.281    | H-1→L+1 (21%), H→L+1 (70%), H-2→L+1 (3%), H→L+2 (2%)                        |
| 4  | 499.091               | 2.484    | 0.247    | H-2→L (86%), H-3→L (4%), H-1→L (3%), H→L+2 (4%)                             |
| 5  | 477.910               | 2.594    | 0.002    | H-1→L+1 (62%), H→L+1 (18%), H→L+2 (11%), H-2→L+1 (3%)                       |
| 6  | 463.544               | 2.675    | 0.228    | H→L+2 (70%), H-2→L (4%), H-1→L+1 (6%), H-1→L+2 (4%), H→L+1 (9%), H→L+3 (3%) |

MO=molecular orbital, H=HOMO, L=LUMO,  $f_{os}$ = oscillator strength, wavelength=  $\lambda$  (nm)

**Table S14:** Wavelength, excitation energy and oscillator strength of **TPD5** at M06/6-311G(d,p) level in the solvent phase.

| NO | DFT<br>$\lambda$ (nm) | $E$ (eV) | $f_{os}$ | MO contributions                                                            |
|----|-----------------------|----------|----------|-----------------------------------------------------------------------------|
| 1  | 758.731               | 1.634    | 1.940    | H-1→L (17%), H→L (79%),                                                     |
| 2  | 644.007               | 1.925    | 0.213    | H-1→L (79%), H→L (19%),                                                     |
| 3  | 551.752               | 2.247    | 0.342    | H-1→L+1 (21%), H→L+1 (71%), H-2→L+1 (3%)                                    |
| 4  | 506.906               | 2.446    | 0.143    | H-2→L (88%), H-3→L (3%), H-1→L (2%), H→L+2 (2%)                             |
| 5  | 483.595               | 2.564    | 0.003    | H-1→L+1 (66%), H→L+1 (20%), H-2→L+1 (2%), H→L+2 (7%)                        |
| 6  | 463.926               | 2.673    | 0.295    | H→L+2 (76%), H-2→L (3%), H-1→L+1 (3%), H-1→L+2 (3%), H→L+1 (6%), H→L+3 (3%) |

MO=molecular orbital, H=HOMO, L=LUMO,  $f_{os}$  = oscillator strength, wavelength=  $\lambda$  (nm)

**Table S15:** Wavelength, excitation energy and oscillator strength of **TPD6** at M06/6-311G(d,p) level in the solvent phase.

| NO | DFT<br>$\lambda$ (nm) | $E$ (eV) | $f_{os}$ | MO contributions                                  |
|----|-----------------------|----------|----------|---------------------------------------------------|
| 1  | 768.465               | 1.613    | 1.901    | H-1→L (16%), H→L (80%),                           |
| 2  | 650.051               | 1.907    | 0.208    | H-1→L (80%), H→L (18%),                           |
| 3  | 576.456               | 2.151    | 0.182    | H-1→L+1 (22%), H→L+1 (72%), H-2→L+1 (4%)          |
| 4  | 511.570               | 2.424    | 0.253    | H-2→L (83%), H-3→L (3%), H-1→L (3%), H→L+2 (6%)   |
| 5  | 500.360               | 2.478    | 0.007    | H-1→L+1 (70%), H→L+1 (24%), H-2→L+1 (2%)          |
| 6  | 479.982               | 2.583    | 0.354    | H→L+2 (76%), H-2→L (8%), H-1→L+2 (4%), H→L+3 (5%) |

MO=molecular orbital, H=HOMO, L=LUMO,  $f_{os}$  = oscillator strength, wavelength=  $\lambda$  (nm)

**Table S16:** Wavelength, excitation energy and oscillator strength of **TPR** at M06/6-311G(d,p) level in the gaseous phase.

| NO | DFT<br>$\lambda$ (nm) | $E$ (eV) | $f_{os}$ | MO contributions                                 |
|----|-----------------------|----------|----------|--------------------------------------------------|
| 1  | 692.688               | 1.790    | 2.852    | H→L (96%), H-1→L+1 (3%)                          |
| 2  | 567.070               | 2.186    | 0.002    | H→L+1 (97%),                                     |
| 3  | 490.095               | 2.530    | 0.056    | H-1→L (69%), H→L+2 (14%), H→L+3 (12%),           |
| 4  | 488.588               | 2.538    | 0.076    | H-1→L (16%), H→L+2 (76%), H-1→L+3 (5%)           |
| 5  | 468.661               | 2.646    | 0.003    | H-1→L (12%), H→L+3 (78%), H-1→L+2 (5%)           |
| 6  | 440.379               | 2.815    | 0.325    | H-2→L (11%), H-1→L+1 (78%), H→L (3%), H→L+4 (6%) |

MO=molecular orbital, H=HOMO, L=LUMO,  $f_{os}$  = oscillator strength, wavelength=  $\lambda$  (nm)

**Table S17:** Wavelength, excitation energy and oscillator strength of **TPD1** at M06/6-311G(d,p) level in the gaseous phase.

| NO | DFT<br>$\lambda$ (nm) | $E$ (eV) | $f_{os}$ | MO contributions                                                                            |
|----|-----------------------|----------|----------|---------------------------------------------------------------------------------------------|
| 1  | 666.223               | 1.861    | 1.785    | H-1→L (11%), H→L (86%),                                                                     |
| 2  | 581.676               | 2.132    | 0.252    | H-1→L (86%), H→L (11%),                                                                     |
| 3  | 503.939               | 2.460    | 0.347    | H-1→L+1 (17%), H→L+1 (73%), H-2→L+1 (3%), H→L+2 (3%)                                        |
| 4  | 470.832               | 2.633    | 0.161    | H-2→L (68%), H→L+2 (19%), H-1→L+1 (3%)                                                      |
| 5  | 456.025               | 2.719    | 0.008    | H-2→L (14%), H-1→L+1 (30%), H→L+2 (28%), H-1→L+2 (9%), H-1→L+3 (3%), H→L+1 (4%), H→L+3 (3%) |
| 6  | 438.169               | 2.830    | 0.130    | H-2→L (10%), H-1→L+1 (28%), H-1→L+2 (10%), H→L+1 (13%), H→L+2 (37%),                        |

MO=molecular orbital, H=HOMO, L=LUMO,  $f_{os}$  = oscillator strength, wavelength=  $\lambda$  (nm)

**Table S18:** Wavelength, excitation energy and oscillator strength of **TPD2** at M06/6-311G(d,p) level in the gaseous phase.

| NO | DFT<br>$\lambda$ (nm) | $E$ (eV) | $f_{os}$ | MO contributions                                                          |
|----|-----------------------|----------|----------|---------------------------------------------------------------------------|
| 1  | 737.167               | 1.682    | 1.202    | H-1→L (11%), H→L (88%),                                                   |
| 2  | 657.985               | 1.884    | 0.461    | H-1→L (87%), H→L (11%),                                                   |
| 3  | 572.517               | 2.166    | 0.580    | H-1→L+1 (24%), H→L+1 (70%),                                               |
| 4  | 513.158               | 2.416    | 0.056    | H-1→L+1 (69%), H→L+1 (25%),                                               |
| 5  | 504.678               | 2.457    | 0.158    | H-2→L (87%), H-3→L (3%), H-1→L+2 (2%), H→L+2 (4%)                         |
| 6  | 458.963               | 2.701    | 0.162    | H→L+2 (76%), H-2→L (5%), H-1→L+4 (3%), H→L+1 (2%), H→L+3 (2%), H→L+4 (5%) |

MO=molecular orbital, H=HOMO, L=LUMO,  $f_{os}$  = oscillator strength, wavelength=  $\lambda$  (nm)

**Table S19:** Wavelength, excitation energy and oscillator strength of **TPD3** at M06/6-311G(d,p) level in the gaseous phase.

| NO | DFT<br>$\lambda$ (nm) | $E$ (eV) | $f_{os}$ | MO contributions                                                |
|----|-----------------------|----------|----------|-----------------------------------------------------------------|
| 1  | 765.335               | 1.620    | 1.090    | H→L (93%), H-1→L (6%)                                           |
| 2  | 679.031               | 1.826    | 0.792    | H-1→L (92%), H→L (6%)                                           |
| 3  | 607.438               | 2.041    | 0.046    | H-1→L+1 (24%), H→L+1 (72%), H-2→L+1 (2%)                        |
| 4  | 544.268               | 2.278    | 0.013    | H-1→L+1 (69%), H→L+1 (27%), H-2→L+1 (2%)                        |
| 5  | 524.934               | 2.362    | 0.676    | H-2→L (39%), H-1→L+2 (10%), H→L+2 (38%), H-3→L (2%), H→L+3 (6%) |
| 6  | 501.757               | 2.471    | 0.003    | H-2→L (50%), H→L+2 (42%),                                       |

MO=molecular orbital, H=HOMO, L=LUMO,  $f_{os}$  = oscillator strength, wavelength=  $\lambda$  (nm)

**Table S20:** Wavelength, excitation energy and oscillator strength of **TPD4** at M06/6-311G(d,p) level in the gaseous phase.

| NO | DFT<br>$\lambda$ (nm) | $E$ (eV) | $f_{os}$ | MO contributions                                                  |
|----|-----------------------|----------|----------|-------------------------------------------------------------------|
| 1  | 691.490               | 1.793    | 1.631    | H-1→L (10%), H→L (88%),                                           |
| 2  | 610.579               | 2.031    | 0.427    | H-1→L (87%), H→L (11%),                                           |
| 3  | 519.480               | 2.387    | 0.280    | H-1→L+1 (21%), H→L+1 (70%), H-2→L+1 (3%), H→L+2 (2%)              |
| 4  | 483.992               | 2.562    | 0.324    | H-2→L (73%), H→L+2 (15%), H-3→L (2%), H-1→L+2 (3%)                |
| 5  | 465.459               | 2.664    | 0.006    | H-1→L+1 (55%), H→L+1 (15%), H→L+2 (13%), H-2→L (4%), H-1→L+2 (5%) |
| 6  | 450.377               | 2.753    | 0.083    | H-2→L (13%), H-1→L+1 (12%), H→L+1 (10%), H→L+2 (56%), H→L+3 (3%)  |

MO=molecular orbital, H=HOMO, L=LUMO,  $f_{os}$ = oscillator strength, wavelength= $\lambda$  (nm)

**Table S21:** Wavelength, excitation energy and oscillator strength of **TPD5** at M06/6-311G(d,p) level in the gaseous phase.

| NO | DFT<br>$\lambda$ (nm) | $E$ (eV) | $f_{os}$ | MO contributions                                                             |
|----|-----------------------|----------|----------|------------------------------------------------------------------------------|
| 1  | 702.579               | 1.765    | 1.575    | H-1→L (10%), H→L (88%),                                                      |
| 2  | 622.254               | 1.993    | 0.395    | H-1→L (87%), H→L (11%),                                                      |
| 3  | 529.214               | 2.343    | 0.350    | H-1→L+1 (22%), H→L+1 (70%), H-2→L+1 (3%)                                     |
| 4  | 490.075               | 2.530    | 0.203    | H-2→L (80%), H-3→L (2%), H-1→L+2 (2%), H→L+2 (9%)                            |
| 5  | 472.357               | 2.625    | 0.006    | H-1→L+1 (62%), H→L+1 (19%), H-1→L+2 (3%), H→L+2 (8%)                         |
| 6  | 452.118               | 2.742    | 0.148    | H-2→L (10%), H→L+2 (67%), H-1→L+1 (6%), H-1→L+3 (2%), H→L+1 (7%), H→L+3 (4%) |

MO=molecular orbital, H=HOMO, L=LUMO,  $f_{os}$ = oscillator strength, wavelength= $\lambda$  (nm)

**Table S22:** Wavelength, excitation energy and oscillator strength of **TPD6** at M06/6-311G(d,p) level in the gaseous phase.

| NO | DFT<br>$\lambda$ (nm) | $E$ (eV) | $f_{os}$ | MO contributions                                   |
|----|-----------------------|----------|----------|----------------------------------------------------|
| 1  | 711.939               | 1.742    | 1.544    | H-1→L (10%), H→L (88%),                            |
| 2  | 629.106               | 1.971    | 0.395    | H-1→L (88%), H→L (10%),                            |
| 3  | 554.095               | 2.238    | 0.136    | H-1→L+1 (23%), H→L+1 (71%), H-2→L+1 (3%)           |
| 4  | 497.469               | 2.492    | 0.416    | H-2→L (66%), H→L+2 (21%), H-3→L (2%), H-1→L+2 (3%) |
| 5  | 488.531               | 2.538    | 0.020    | H-1→L+1 (67%), H→L+1 (26%), H-2→L+1 (2%)           |
| 6  | 466.949               | 2.655    | 0.133    | H-2→L (23%), H→L+2 (64%), H→L+3 (4%)               |

MO=molecular orbital, H=HOMO, L=LUMO,  $f_{os}$ = oscillator strength, wavelength= $\lambda$  (nm)



**Table S23:** Natural bond orbitals analysis for TPR with its representative values.

| Donor( <i>i</i> ) | Type     | Acceptor( <i>j</i> ) | Type       | <i>E</i> (2)<br>[kcal/mol] | <i>E</i> ( <i>j</i> )- <i>E</i> ( <i>i</i> )<br>[a.u.] | <i>F</i> ( <i>i</i> , <i>j</i> )<br>[a.u.] |
|-------------------|----------|----------------------|------------|----------------------------|--------------------------------------------------------|--------------------------------------------|
| C9-C10            | $\pi$    | C30-C32              | $\pi^*$    | 28.62                      | 0.31                                                   | 0.084                                      |
| C25-C27           | $\pi$    | C44-C46              | $\pi^*$    | 28.42                      | 0.31                                                   | 0.084                                      |
| C30-C32           | $\pi$    | C33-C59              | $\pi^*$    | 26.32                      | 0.3                                                    | 0.08                                       |
| C44-C46           | $\pi$    | C47-O57              | $\pi^*$    | 23.14                      | 0.31                                                   | 0.077                                      |
| C50-C51           | $\pi$    | C49-C54              | $\pi^*$    | 21.2                       | 0.32                                                   | 0.075                                      |
| C12-C13           | $\pi$    | C1-C2                | $\pi^*$    | 19.23                      | 0.31                                                   | 0.072                                      |
| C1-C2             | $\pi$    | C4-C5                | $\pi^*$    | 18.3                       | 0.32                                                   | 0.071                                      |
| C19-C24           | $\pi$    | C15-C16              | $\pi^*$    | 11.75                      | 0.3                                                    | 0.055                                      |
| C48-C60           | $\pi$    | C49-C54              | $\pi^*$    | 8.56                       | 0.33                                                   | 0.05                                       |
| C47-O57           | $\pi$    | C49-C54              | $\pi^*$    | 4.2                        | 0.42                                                   | 0.042                                      |
| C34-O58           | $\pi$    | C30-C32              | $\pi^*$    | 3.7                        | 0.43                                                   | 0.038                                      |
| C30-C32           | $\pi$    | C30-C32              | $\pi^*$    | 2.47                       | 0.31                                                   | 0.025                                      |
| C4-C5             | $\pi$    | C4-C5                | $\pi^*$    | 1.01                       | 0.31                                                   | 0.016                                      |
| C87-N88           | $\pi$    | C85-N86              | $\pi^*$    | 0.78                       | 0.47                                                   | 0.017                                      |
| C85-N86           | $\pi$    | C87-N88              | $\pi^*$    | 0.77                       | 0.47                                                   | 0.017                                      |
| C59-C63           | $\sigma$ | C63-N64              | $\sigma^*$ | 8.21                       | 1.61                                                   | 0.103                                      |
| C63-N64           | $\sigma$ | C59-C63              | $\sigma^*$ | 8.11                       | 1.57                                                   | 0.102                                      |
| C60-C85           | $\sigma$ | C85-N86              | $\sigma^*$ | 8.1                        | 1.61                                                   | 0.103                                      |
| C15-C16           | $\sigma$ | C13-S18              | $\sigma^*$ | 7.02                       | 0.93                                                   | 0.072                                      |
| C20-C21           | $\sigma$ | C24-C31              | $\sigma^*$ | 6.3                        | 1.15                                                   | 0.076                                      |
| C4-C5             | $\sigma$ | C1-C5                | $\sigma^*$ | 6.02                       | 1.27                                                   | 0.078                                      |
| S23-C27           | $\sigma$ | C21-C24              | $\sigma^*$ | 5.7                        | 1.2                                                    | 0.074                                      |
| C65-C66           | $\sigma$ | C65-C67              | $\sigma^*$ | 5                          | 1.3                                                    | 0.072                                      |
| C38-C39           | $\sigma$ | C37-C38              | $\sigma^*$ | 4.06                       | 1.32                                                   | 0.065                                      |
| C80-C82           | $\sigma$ | C77-C80              | $\sigma^*$ | 4.01                       | 1.3                                                    | 0.065                                      |
| C65-C67           | $\sigma$ | C3-C65               | $\sigma^*$ | 3.08                       | 1.13                                                   | 0.053                                      |
| C49-C50           | $\sigma$ | C50-C51              | $\sigma^*$ | 2.97                       | 1.29                                                   | 0.055                                      |
| C5-S17            | $\sigma$ | C1-C2                | $\sigma^*$ | 2.3                        | 1.23                                                   | 0.048                                      |
| C38-H42           | $\sigma$ | C39-F97              | $\sigma^*$ | 1.5                        | 0.84                                                   | 0.032                                      |
| C65-C67           | $\sigma$ | C67-H71              | $\sigma^*$ | 1.3                        | 1.12                                                   | 0.034                                      |
| C76-C78           | $\sigma$ | C78-H83              | $\sigma^*$ | 1.25                       | 1.13                                                   | 0.034                                      |
| C5-S17            | $\sigma$ | C4-C5                | $\sigma^*$ | 1.1                        | 1.25                                                   | 0.033                                      |
| C61-N62           | $\sigma$ | C33-C59              | $\sigma^*$ | 0.52                       | 1.65                                                   | 0.026                                      |
| C16-C19           | $\sigma$ | C19-S22              | $\sigma^*$ | 0.51                       | 0.94                                                   | 0.02                                       |
| C1-C2             | $\sigma$ | C3-O28               | $\sigma^*$ | 0.5                        | 0.98                                                   | 0.02                                       |
| O28               | LP(2)    | C1-C2                | $\pi^*$    | 34.46                      | 0.35                                                   | 0.106                                      |
| S22               | LP(2)    | C19-C24              | $\pi^*$    | 26.94                      | 0.27                                                   | 0.078                                      |
| S18               | LP(2)    | C12-C13              | $\pi^*$    | 25.56                      | 0.25                                                   | 0.076                                      |
| S17               | LP(2)    | C6-C7                | $\pi^*$    | 22.73                      | 0.25                                                   | 0.071                                      |
| S8                | LP(2)    | C9-C10               | $\pi^*$    | 19.56                      | 0.27                                                   | 0.066                                      |
| S23               | LP(2)    | C25-C27              | $\pi^*$    | 19.24                      | 0.27                                                   | 0.066                                      |
| O58               | LP(2)    | C34-C36              | $\sigma^*$ | 20.82                      | 0.75                                                   | 0.113                                      |
| N62               | LP(1)    | C59-C61              | $\sigma^*$ | 12.68                      | 1.04                                                   | 0.103                                      |
| F97               | LP(2)    | C39-C40              | $\sigma^*$ | 7.6                        | 0.98                                                   | 0.077                                      |
| O28               | LP(1)    | C3-C4                | $\sigma^*$ | 3.36                       | 0.98                                                   | 0.051                                      |
| O57               | LP(1)    | C47-C54              | $\sigma^*$ | 1.9                        | 1.18                                                   | 0.043                                      |
| S14               | LP(1)    | C16-C19              | $\sigma^*$ | 0.51                       | 1.2                                                    | 0.022                                      |

**Table S24:** Natural bond orbitals analysis for **TPD1** with its representative values.

| Donor( <i>i</i> ) | Type     | Acceptor( <i>j</i> ) | Type       | <i>E</i> (2)<br>[kcal/mol] | <i>E</i> ( <i>j</i> )- <i>E</i> ( <i>i</i> )<br>[a.u.] | <i>F</i> ( <i>i,j</i> )<br>[a.u.] |
|-------------------|----------|----------------------|------------|----------------------------|--------------------------------------------------------|-----------------------------------|
| C25-C27           | $\pi$    | C31-C33              | $\pi^*$    | 29.04                      | 0.31                                                   | 0.085                             |
| C31-C33           | $\pi$    | C35-C45              | $\pi^*$    | 26.65                      | 0.3                                                    | 0.08                              |
| C59-C63           | $\pi$    | C56-C57              | $\pi^*$    | 24.96                      | 0.29                                                   | 0.076                             |
| C31-C33           | $\pi$    | C34-O44              | $\pi^*$    | 23.16                      | 0.31                                                   | 0.077                             |
| C36-C37           | $\pi$    | C40-C41              | $\pi^*$    | 21.5                       | 0.31                                                   | 0.073                             |
| C86-C98           | $\pi$    | C81-C84              | $\pi^*$    | 20.12                      | 0.29                                                   | 0.07                              |
| C56-C57           | $\pi$    | C59-C63              | $\pi^*$    | 18.9                       | 0.31                                                   | 0.069                             |
| C6-C7             | $\pi$    | C4-C5                | $\pi^*$    | 17.09                      | 0.32                                                   | 0.068                             |
| C9-C10            | $\pi$    | C6-C7                | $\pi^*$    | 15.16                      | 0.29                                                   | 0.065                             |
| C15-C16           | $\pi$    | C12-C13              | $\pi^*$    | 13.08                      | 0.29                                                   | 0.06                              |
| C35-C45           | $\pi$    | C31-C33              | $\pi^*$    | 7.81                       | 0.33                                                   | 0.046                             |
| C34-O44           | $\pi$    | C40-C41              | $\pi^*$    | 4.1                        | 0.44                                                   | 0.041                             |
| C68-N69           | $\pi$    | C66-N67              | $\pi^*$    | 0.81                       | 0.47                                                   | 0.017                             |
| C66-N67           | $\pi$    | C68-N69              | $\pi^*$    | 0.79                       | 0.47                                                   | 0.017                             |
| C15-C16           | $\pi$    | C15-C16              | $\pi^*$    | 0.61                       | 0.31                                                   | 0.013                             |
| C45 - C68         | $\sigma$ | C68 - N69            | $\sigma^*$ | 8.18                       | 1.61                                                   | 0.103                             |
| C25 - C27         | $\sigma$ | C20 - S22            | $\sigma^*$ | 8.09                       | 0.92                                                   | 0.077                             |
| C68 - N69         | $\sigma$ | C45 - C68            | $\sigma^*$ | 8.08                       | 1.57                                                   | 0.101                             |
| C15 - C16         | $\sigma$ | C13 - S18            | $\sigma^*$ | 7.04                       | 0.93                                                   | 0.073                             |
| C88 - C90         | $\sigma$ | C78 - C79            | $\sigma^*$ | 6.77                       | 1.21                                                   | 0.081                             |
| C79 - C88         | $\sigma$ | C83 - N 100          | $\sigma^*$ | 5.01                       | 1.15                                                   | 0.068                             |
| C48 - H52         | $\sigma$ | C46 - C47            | $\sigma^*$ | 4.8                        | 1.11                                                   | 0.065                             |
| C80 - C81         | $\sigma$ | C78 - C80            | $\sigma^*$ | 4                          | 1.29                                                   | 0.064                             |
| C92 - N 100       | $\sigma$ | C83 - N 100          | $\sigma^*$ | 3.59                       | 1.25                                                   | 0.06                              |
| C81 - C84         | $\sigma$ | C84 - C86            | $\sigma^*$ | 3.4                        | 1.3                                                    | 0.06                              |
| C38 - C39         | $\sigma$ | C39 - C40            | $\sigma^*$ | 3.1                        | 1.3                                                    | 0.057                             |
| C88 - C90         | $\sigma$ | C79 - C88            | $\sigma^*$ | 2.99                       | 1.25                                                   | 0.055                             |
| C 3 - C46         | $\sigma$ | C 3 - C 4            | $\sigma^*$ | 2                          | 1.06                                                   | 0.041                             |
| C21 - S23         | $\sigma$ | C21 - C24            | $\sigma^*$ | 1.85                       | 1.26                                                   | 0.043                             |
| C31 - C33         | $\sigma$ | C35 - C36            | $\sigma^*$ | 1.4                        | 1.22                                                   | 0.037                             |
| C83 - N 100       | $\sigma$ | C79 - C88            | $\sigma^*$ | 1.08                       | 1.41                                                   | 0.035                             |
| C57 - H60         | $\sigma$ | C57 - C59            | $\sigma^*$ | 0.89                       | 1.12                                                   | 0.028                             |
| C12 - S14         | $\sigma$ | C15 - C16            | $\sigma^*$ | 0.5                        | 1.23                                                   | 0.022                             |
| C15 - C16         | $\sigma$ | O29 - C30            | $\sigma^*$ | 0.5                        | 0.98                                                   | 0.02                              |
| C20 - C21         | $\sigma$ | C21 - S23            | $\sigma^*$ | 0.5                        | 0.94                                                   | 0.019                             |
| N 100             | LP ( 1)  | C83 - C97            | $\pi^*$    | 43.95                      | 0.31                                                   | 0.106                             |
| O28               | LP ( 2)  | C 1 - C 2            | $\pi^*$    | 28.63                      | 0.36                                                   | 0.097                             |
| S 8               | LP ( 2)  | C 6 - C 7            | $\pi^*$    | 25.09                      | 0.26                                                   | 0.075                             |
| S17               | LP ( 2)  | C 6 - C 7            | $\pi^*$    | 24.64                      | 0.26                                                   | 0.074                             |
| S18               | LP ( 2)  | C 1 - C 2            | $\pi^*$    | 22.34                      | 0.27                                                   | 0.071                             |
| S23               | LP ( 2)  | C25 - C27            | $\pi^*$    | 19.17                      | 0.27                                                   | 0.065                             |
| O44               | LP ( 2)  | C34 - C41            | $\sigma^*$ | 20.31                      | 0.76                                                   | 0.112                             |
| N69               | LP ( 1)  | C45 - C68            | $\sigma^*$ | 12.65                      | 1.04                                                   | 0.103                             |
| O29               | LP ( 2)  | C30 - C 107          | $\sigma^*$ | 5.29                       | 0.74                                                   | 0.058                             |
| S14               | LP ( 1)  | C15 - C16            | $\sigma^*$ | 2.79                       | 1.21                                                   | 0.052                             |
| S18               | LP ( 1)  | C13 - C15            | $\sigma^*$ | 0.7                        | 1.21                                                   | 0.026                             |
| S18               | LP ( 1)  | C 1 - C 5            | $\sigma^*$ | 0.51                       | 1.2                                                    | 0.022                             |

**Table S25:** Natural bond orbitals analysis for TPD2 with its representative values.

| Donor( <i>i</i> ) | Type     | Acceptor( <i>j</i> ) | Type       | <i>E</i> (2)<br>[kcal/mol] | <i>E</i> ( <i>j</i> )- <i>E</i> ( <i>i</i> )<br>[a.u.] | <i>F</i> ( <i>i,j</i> )<br>[a.u.] |
|-------------------|----------|----------------------|------------|----------------------------|--------------------------------------------------------|-----------------------------------|
| C25-C27           | $\pi$    | C31-C33              | $\pi^*$    | 31.48                      | 0.3                                                    | 0.087                             |
| C38-C39           | $\pi$    | N102-O103            | $\pi^*$    | 28.54                      | 0.16                                                   | 0.064                             |
| C31-C33           | $\pi$    | C35-C45              | $\pi^*$    | 28.42                      | 0.29                                                   | 0.082                             |
| C51-C53           | $\pi$    | C46-C48              | $\pi^*$    | 24.11                      | 0.3                                                    | 0.075                             |
| C47-C49           | $\pi$    | C51-C53              | $\pi^*$    | 22.72                      | 0.31                                                   | 0.075                             |
| C56-C57           | $\pi$    | C58-C61              | $\pi^*$    | 21.02                      | 0.31                                                   | 0.072                             |
| C12-C13           | $\pi$    | C15-C16              | $\pi^*$    | 20.69                      | 0.31                                                   | 0.075                             |
| C86-C98           | $\pi$    | C81-C84              | $\pi^*$    | 20.15                      | 0.29                                                   | 0.07                              |
| C6-C7             | $\pi$    | C4-C5                | $\pi^*$    | 17.31                      | 0.31                                                   | 0.069                             |
| C19-C24           | $\pi$    | C15-C16              | $\pi^*$    | 11.74                      | 0.3                                                    | 0.055                             |
| C34-O44           | $\pi$    | C31-C33              | $\pi^*$    | 3.6                        | 0.43                                                   | 0.038                             |
| C19-C24           | $\pi$    | C19-C24              | $\pi^*$    | 1.37                       | 0.31                                                   | 0.019                             |
| C68-N69           | $\pi$    | C66-N67              | $\pi^*$    | 0.8                        | 0.47                                                   | 0.017                             |
| C66-N67           | $\pi$    | C68-N69              | $\pi^*$    | 0.78                       | 0.47                                                   | 0.017                             |
| C15-C16           | $\pi$    | C15-C16              | $\pi^*$    | 0.75                       | 0.31                                                   | 0.014                             |
| C45-C68           | $\sigma$ | C68-N69              | $\sigma^*$ | 8.22                       | 1.61                                                   | 0.103                             |
| C25-C27           | $\sigma$ | C20-S22              | $\sigma^*$ | 8.18                       | 0.92                                                   | 0.077                             |
| C68-N69           | $\sigma$ | C45-C68              | $\sigma^*$ | 8.14                       | 1.57                                                   | 0.102                             |
| C1-C2             | $\sigma$ | C12-S14              | $\sigma^*$ | 7.06                       | 0.93                                                   | 0.073                             |
| C12-C13           | $\sigma$ | C15-O29              | $\sigma^*$ | 6.33                       | 1.12                                                   | 0.075                             |
| C35-C45           | $\sigma$ | C45-C68              | $\sigma^*$ | 6.02                       | 1.27                                                   | 0.078                             |
| C25-H26           | $\sigma$ | S23-C27              | $\sigma^*$ | 5.8                        | 0.72                                                   | 0.058                             |
| C20-C21           | $\sigma$ | C20-C25              | $\sigma^*$ | 5                          | 1.31                                                   | 0.072                             |
| C98-H99           | $\sigma$ | C84-C86              | $\sigma^*$ | 3.97                       | 1.11                                                   | 0.059                             |
| C46-C47           | $\sigma$ | C48-H52              | $\sigma^*$ | 2.8                        | 1.12                                                   | 0.05                              |
| C3-C4             | $\sigma$ | C3-C105              | $\sigma^*$ | 1.9                        | 1.05                                                   | 0.04                              |
| C38-C39           | $\sigma$ | C38-H101             | $\sigma^*$ | 1.37                       | 1.16                                                   | 0.036                             |
| C48-C51           | $\sigma$ | C51-H55              | $\sigma^*$ | 1.2                        | 1.12                                                   | 0.033                             |
| C3-C4             | $\sigma$ | C105-H108            | $\sigma^*$ | 1.16                       | 1.05                                                   | 0.031                             |
| N102-O103         | $\sigma$ | C39-N102             | $\sigma^*$ | 1.1                        | 1.4                                                    | 0.036                             |
| C36-C37           | $\sigma$ | C33-C35              | $\sigma^*$ | 1.01                       | 1.24                                                   | 0.032                             |
| C1-C2             | $\sigma$ | C3-O28               | $\sigma^*$ | 0.6                        | 0.99                                                   | 0.022                             |
| C66-N67           | $\sigma$ | C35-C45              | $\sigma^*$ | 0.52                       | 1.64                                                   | 0.026                             |
| C38-C39           | $\sigma$ | C39-N102             | $\sigma^*$ | 0.51                       | 1.02                                                   | 0.021                             |
| C12-S14           | $\sigma$ | C15-C16              | $\sigma^*$ | 0.5                        | 1.23                                                   | 0.022                             |
| N100              | LP(1)    | C83-C97              | $\pi^*$    | 43.96                      | 0.31                                                   | 0.106                             |
| S23               | LP(2)    | C20-C21              | $\pi^*$    | 28.93                      | 0.24                                                   | 0.079                             |
| S8                | LP(2)    | C6-C7                | $\pi^*$    | 25.2                       | 0.26                                                   | 0.075                             |
| S18               | LP(2)    | C12-C13              | $\pi^*$    | 24.58                      | 0.25                                                   | 0.074                             |
| S14               | LP(2)    | C15-C16              | $\pi^*$    | 20.36                      | 0.27                                                   | 0.068                             |
| S23               | LP(2)    | C25-C27              | $\pi^*$    | 18.52                      | 0.27                                                   | 0.064                             |
| O44               | LP(2)    | C34-C41              | $\sigma^*$ | 20.95                      | 0.75                                                   | 0.113                             |
| N67               | LP(1)    | C45-C66              | $\sigma^*$ | 12.68                      | 1.04                                                   | 0.103                             |
| O103              | LP(1)    | C39-N102             | $\sigma^*$ | 4.16                       | 1.09                                                   | 0.062                             |
| S18               | LP(1)    | C12-C13              | $\sigma^*$ | 2.7                        | 1.2                                                    | 0.051                             |
| O28               | LP(2)    | C2-C12               | $\sigma^*$ | 1.6                        | 0.89                                                   | 0.035                             |
| S18               | LP(1)    | C1-C5                | $\sigma^*$ | 0.51                       | 1.2                                                    | 0.022                             |

**Table S26:** Natural bond orbitals analysis for TPD3 with its representative values.

| Donor( <i>i</i> ) | Type     | Acceptor( <i>j</i> ) | Type       | <i>E</i> (2)<br>[kcal/mol] | <i>E</i> ( <i>j</i> )- <i>E</i> ( <i>i</i> )<br>[a.u.] | <i>F</i> ( <i>i,j</i> )<br>[a.u.] |
|-------------------|----------|----------------------|------------|----------------------------|--------------------------------------------------------|-----------------------------------|
| C25-C27           | $\pi$    | C31-C33              | $\pi^*$    | 31.66                      | 0.3                                                    | 0.088                             |
| C20-C21           | $\pi$    | C25-C27              | $\pi^*$    | 25.76                      | 0.3                                                    | 0.08                              |
| C31-C33           | $\pi$    | C34-O43              | $\pi^*$    | 25.24                      | 0.3                                                    | 0.08                              |
| C47-C50           | $\pi$    | C48-C52              | $\pi^*$    | 23.11                      | 0.31                                                   | 0.075                             |
| C80-C83           | $\pi$    | C82-C96              | $\pi^*$    | 22.79                      | 0.29                                                   | 0.073                             |
| C12-C13           | $\pi$    | C15-C16              | $\pi^*$    | 21.12                      | 0.31                                                   | 0.075                             |
| C60-C62           | $\pi$    | C56-C58              | $\pi^*$    | 20.99                      | 0.3                                                    | 0.071                             |
| C82-C96           | $\pi$    | C80-C83              | $\pi^*$    | 19.71                      | 0.3                                                    | 0.069                             |
| C6-C7             | $\pi$    | C4-C5                | $\pi^*$    | 17.52                      | 0.32                                                   | 0.069                             |
| C1-C2             | $\pi$    | C4-C5                | $\pi^*$    | 15.3                       | 0.32                                                   | 0.065                             |
| C4-C5             | $\pi$    | C1-C2                | $\pi^*$    | 13                         | 0.3                                                    | 0.059                             |
| N104-O106         | $\pi$    | C38-C39              | $\pi^*$    | 2.25                       | 0.52                                                   | 0.033                             |
| C67-N68           | $\pi$    | C65-N66              | $\pi^*$    | 0.79                       | 0.47                                                   | 0.017                             |
| C65-N66           | $\pi$    | C67-N68              | $\pi^*$    | 0.73                       | 0.48                                                   | 0.017                             |
| C15-C16           | $\pi$    | C15-C16              | $\pi^*$    | 0.7                        | 0.3                                                    | 0.014                             |
| S23-C27           | $\sigma$ | C21-C24              | $\sigma^*$ | 5.66                       | 1.2                                                    | 0.074                             |
| C19-C24           | $\sigma$ | S14-C16              | $\sigma^*$ | 5.64                       | 0.92                                                   | 0.065                             |
| C107-H110         | $\sigma$ | C3-O28               | $\sigma^*$ | 5.64                       | 0.76                                                   | 0.059                             |
| C89-C91           | $\sigma$ | C82-N99              | $\sigma^*$ | 4.9                        | 1.15                                                   | 0.067                             |
| C79-C80           | $\sigma$ | C77-C79              | $\sigma^*$ | 4                          | 1.29                                                   | 0.064                             |
| C69-H71           | $\sigma$ | C60-C62              | $\sigma^*$ | 3.42                       | 1.1                                                    | 0.055                             |
| C36-C41           | $\sigma$ | C35-C36              | $\sigma^*$ | 3.1                        | 1.16                                                   | 0.054                             |
| C91-N99           | $\sigma$ | C77-C78              | $\sigma^*$ | 3.02                       | 1.33                                                   | 0.057                             |
| C3-C107           | $\sigma$ | C45-C47              | $\sigma^*$ | 2.9                        | 1.23                                                   | 0.053                             |
| C77-C78           | $\sigma$ | C91-N99              | $\sigma^*$ | 2.7                        | 1.13                                                   | 0.049                             |
| C3-C45            | $\sigma$ | C2-O28               | $\sigma^*$ | 2.52                       | 1.02                                                   | 0.045                             |
| C20-C25           | $\sigma$ | C25-H26              | $\sigma^*$ | 2.3                        | 1.16                                                   | 0.046                             |
| C78-N99           | $\sigma$ | C77-C78              | $\sigma^*$ | 1.98                       | 1.33                                                   | 0.046                             |
| C12-S14           | $\sigma$ | C1-C2                | $\sigma^*$ | 1.76                       | 1.24                                                   | 0.042                             |
| C30-C55           | $\sigma$ | C111-H113            | $\sigma^*$ | 1.46                       | 1.03                                                   | 0.035                             |
| C45-C47           | $\sigma$ | C47-H51              | $\sigma^*$ | 1.3                        | 1.12                                                   | 0.034                             |
| N104-O106         | $\sigma$ | C38-C39              | $\sigma^*$ | 0.8                        | 1.67                                                   | 0.033                             |
| C12-C13           | $\sigma$ | C13-S18              | $\sigma^*$ | 0.51                       | 0.93                                                   | 0.019                             |
| C12-S14           | $\sigma$ | C15-C16              | $\sigma^*$ | 0.51                       | 1.23                                                   | 0.022                             |
| C13-S18           | $\sigma$ | C1-C2                | $\sigma^*$ | 0.51                       | 1.24                                                   | 0.022                             |
| N99               | LP(1)    | C82-C96              | $\pi^*$    | 43.98                      | 0.31                                                   | 0.106                             |
| O28               | LP(2)    | C1-C2                | $\pi^*$    | 31.25                      | 0.36                                                   | 0.101                             |
| S14               | LP(2)    | C12-C13              | $\pi^*$    | 25.8                       | 0.25                                                   | 0.076                             |
| S18               | LP(2)    | C1-C2                | $\pi^*$    | 22.53                      | 0.27                                                   | 0.072                             |
| O105              | LP(2)    | N104-O106            | $\pi^*$    | 2.52                       | 0.2                                                    | 0.023                             |
| O106              | LP(2)    | C38-C39              | $\pi^*$    | 0.85                       | 0.32                                                   | 0.016                             |
| O43               | LP(2)    | C34-C41              | $\sigma^*$ | 21.65                      | 0.73                                                   | 0.114                             |
| O102              | LP(2)    | C37-N101             | $\sigma^*$ | 15.83                      | 0.57                                                   | 0.085                             |
| N68               | LP(1)    | C44-C67              | $\sigma^*$ | 12.87                      | 1.04                                                   | 0.103                             |
| S18               | LP(1)    | C1-C2                | $\sigma^*$ | 2.87                       | 1.22                                                   | 0.053                             |
| O43               | LP(1)    | C25-H26              | $\sigma^*$ | 1.5                        | 1.14                                                   | 0.037                             |
| S14               | LP(1)    | C16-C19              | $\sigma^*$ | 0.5                        | 1.21                                                   | 0.022                             |

**Table S27:** Natural bond orbitals analysis for TPD4 with its representative values.

| Donor( <i>i</i> ) | Type     | Acceptor( <i>j</i> ) | Type       | <i>E</i> (2)<br>[kcal/mol] | <i>E</i> ( <i>j</i> )- <i>E</i> ( <i>i</i> )<br>[a.u.] | <i>F</i> ( <i>i,j</i> )<br>[a.u.] |
|-------------------|----------|----------------------|------------|----------------------------|--------------------------------------------------------|-----------------------------------|
| C25-C27           | $\pi$    | C31-C33              | $\pi^*$    | 29.86                      | 0.31                                                   | 0.086                             |
| C31-C33           | $\pi$    | C35-C45              | $\pi^*$    | 27.26                      | 0.3                                                    | 0.081                             |
| C20-C21           | $\pi$    | C25-C27              | $\pi^*$    | 24.94                      | 0.31                                                   | 0.08                              |
| C40-C41           | $\pi$    | C38-C39              | $\pi^*$    | 22.88                      | 0.28                                                   | 0.072                             |
| C46-C47           | $\pi$    | C48-C51              | $\pi^*$    | 20.97                      | 0.31                                                   | 0.072                             |
| C83-C97           | $\pi$    | C81-C84              | $\pi^*$    | 19.71                      | 0.3                                                    | 0.069                             |
| C81-C84           | $\pi$    | C78-C80              | $\pi^*$    | 17.21                      | 0.3                                                    | 0.066                             |
| C1-C2             | $\pi$    | C12-C13              | $\pi^*$    | 15.11                      | 0.29                                                   | 0.064                             |
| C4-C5             | $\pi$    | C1-C2                | $\pi^*$    | 12.71                      | 0.3                                                    | 0.059                             |
| C35-C45           | $\pi$    | C36-C37              | $\pi^*$    | 9.1                        | 0.33                                                   | 0.05                              |
| C35-C45           | $\pi$    | C31-C33              | $\pi^*$    | 7.87                       | 0.33                                                   | 0.046                             |
| C19-C24           | $\pi$    | C19-C24              | $\pi^*$    | 1.3                        | 0.3                                                    | 0.018                             |
| C68-N69           | $\pi$    | C66-N67              | $\pi^*$    | 0.84                       | 0.47                                                   | 0.018                             |
| C66-N67           | $\pi$    | C68-N69              | $\pi^*$    | 0.82                       | 0.47                                                   | 0.018                             |
| C15-C16           | $\pi$    | C15-C16              | $\pi^*$    | 0.61                       | 0.31                                                   | 0.013                             |
| C45-C68           | $\sigma$ | C68-N69              | $\sigma^*$ | 8.15                       | 1.61                                                   | 0.103                             |
| C45-C66           | $\sigma$ | C66-N67              | $\sigma^*$ | 8.13                       | 1.61                                                   | 0.103                             |
| C68-N69           | $\sigma$ | C45-C68              | $\sigma^*$ | 8.06                       | 1.57                                                   | 0.101                             |
| C1-C2             | $\sigma$ | C12-S14              | $\sigma^*$ | 7.02                       | 0.94                                                   | 0.073                             |
| C88-C90           | $\sigma$ | C78-C79              | $\sigma^*$ | 6.76                       | 1.21                                                   | 0.081                             |
| C35-C45           | $\sigma$ | C45-C68              | $\sigma^*$ | 6.06                       | 1.27                                                   | 0.078                             |
| C4-C5             | $\sigma$ | C4-C6                | $\sigma^*$ | 5.98                       | 1.28                                                   | 0.078                             |
| C21-C24           | $\sigma$ | C19-C24              | $\sigma^*$ | 5                          | 1.29                                                   | 0.072                             |
| C10-C78           | $\sigma$ | C78-C79              | $\sigma^*$ | 4.1                        | 1.23                                                   | 0.064                             |
| C45-C66           | $\sigma$ | C68-N69              | $\sigma^*$ | 3.8                        | 1.61                                                   | 0.07                              |
| C83-N100          | $\sigma$ | C79-N100             | $\sigma^*$ | 3.4                        | 1.27                                                   | 0.059                             |
| C88-C90           | $\sigma$ | C79-C88              | $\sigma^*$ | 2.99                       | 1.25                                                   | 0.055                             |
| C34-C41           | $\sigma$ | C34-O44              | $\sigma^*$ | 2.01                       | 1.25                                                   | 0.045                             |
| C78-C80           | $\sigma$ | C80-H82              | $\sigma^*$ | 1.4                        | 1.14                                                   | 0.036                             |
| C25-C27           | $\sigma$ | C31-H32              | $\sigma^*$ | 1.3                        | 1.13                                                   | 0.034                             |
| C31-H32           | $\sigma$ | C31-C33              | $\sigma^*$ | 1.13                       | 1.12                                                   | 0.032                             |
| C5-S17            | $\sigma$ | C1-C5                | $\sigma^*$ | 0.8                        | 1.21                                                   | 0.028                             |
| C107-H109         | $\sigma$ | C3-O28               | $\sigma^*$ | 0.56                       | 0.76                                                   | 0.019                             |
| C66-N67           | $\sigma$ | C35-C45              | $\sigma^*$ | 0.52                       | 1.65                                                   | 0.026                             |
| C12-S14           | $\sigma$ | C15-C16              | $\sigma^*$ | 0.51                       | 1.23                                                   | 0.022                             |
| N100              | LP(1)    | C83-C97              | $\pi^*$    | 43.97                      | 0.31                                                   | 0.106                             |
| O29               | LP(2)    | C15-C16              | $\pi^*$    | 31.93                      | 0.36                                                   | 0.103                             |
| S22               | LP(2)    | C19-C24              | $\pi^*$    | 27.03                      | 0.27                                                   | 0.078                             |
| S18               | LP(2)    | C12-C13              | $\pi^*$    | 24.52                      | 0.25                                                   | 0.074                             |
| S14               | LP(2)    | C15-C16              | $\pi^*$    | 20.6                       | 0.27                                                   | 0.068                             |
| S23               | LP(2)    | C25-C27              | $\pi^*$    | 18.56                      | 0.27                                                   | 0.065                             |
| O44               | LP(2)    | C34-C41              | $\sigma^*$ | 20.69                      | 0.75                                                   | 0.113                             |
| O29               | LP(1)    | C15-C16              | $\sigma^*$ | 7.75                       | 1.12                                                   | 0.083                             |
| O44               | LP(1)    | C33-C34              | $\sigma^*$ | 3.16                       | 1.17                                                   | 0.055                             |
| S17               | LP(1)    | C4-C5                | $\sigma^*$ | 2.97                       | 1.24                                                   | 0.054                             |
| S8                | LP(1)    | C4-C6                | $\sigma^*$ | 0.91                       | 1.21                                                   | 0.03                              |
| C1102             | LP(2)    | C37-C38              | $\sigma^*$ | 0.5                        | 0.91                                                   | 0.019                             |

**Table S28:** Natural bond orbitals analysis for **TPD5** with its representative values.

| Donor( <i>i</i> ) | Type     | Acceptor( <i>j</i> ) | Type       | <i>E</i> (2)<br>[kcal/mol] | <i>E</i> ( <i>j</i> )- <i>E</i> ( <i>i</i> )<br>[a.u.] | <i>F</i> ( <i>i</i> , <i>j</i> )<br>[a.u.] |
|-------------------|----------|----------------------|------------|----------------------------|--------------------------------------------------------|--------------------------------------------|
| C25-C27           | $\pi$    | C31-C33              | $\pi^*$    | 30.59                      | 0.31                                                   | 0.087                                      |
| C31-C33           | $\pi$    | C35-C45              | $\pi^*$    | 27.53                      | 0.3                                                    | 0.081                                      |
| C20-C21           | $\pi$    | C25-C27              | $\pi^*$    | 25.24                      | 0.3                                                    | 0.08                                       |
| C48-C51           | $\pi$    | C49-C53              | $\pi^*$    | 23                         | 0.31                                                   | 0.075                                      |
| C40-C41           | $\pi$    | C36-C37              | $\pi^*$    | 22.01                      | 0.3                                                    | 0.074                                      |
| C38-C39           | $\pi$    | C40-C41              | $\pi^*$    | 21.53                      | 0.32                                                   | 0.074                                      |
| C15-C16           | $\pi$    | C19-C24              | $\pi^*$    | 20.13                      | 0.31                                                   | 0.074                                      |
| C38-C39           | $\pi$    | C36-C37              | $\pi^*$    | 19.12                      | 0.31                                                   | 0.069                                      |
| C79-C88           | $\pi$    | C78-C80              | $\pi^*$    | 18.66                      | 0.31                                                   | 0.068                                      |
| C81-C84           | $\pi$    | C78-C80              | $\pi^*$    | 17.21                      | 0.3                                                    | 0.066                                      |
| C20-C21           | $\pi$    | C19-C24              | $\pi^*$    | 16.4                       | 0.31                                                   | 0.064                                      |
| C9-C10            | $\pi$    | C6-C7                | $\pi^*$    | 15.13                      | 0.29                                                   | 0.065                                      |
| C68-N69           | $\pi$    | C66-N67              | $\pi^*$    | 0.77                       | 0.47                                                   | 0.017                                      |
| C66-N67           | $\pi$    | C68-N69              | $\pi^*$    | 0.76                       | 0.47                                                   | 0.017                                      |
| C15-C16           | $\pi$    | C15-C16              | $\pi^*$    | 0.72                       | 0.31                                                   | 0.014                                      |
| C45-C68           | $\sigma$ | C68-N69              | $\sigma^*$ | 8.23                       | 1.61                                                   | 0.103                                      |
| C25-C27           | $\sigma$ | C20-S22              | $\sigma^*$ | 8.17                       | 0.92                                                   | 0.077                                      |
| C68-N69           | $\sigma$ | C45-C68              | $\sigma^*$ | 8.13                       | 1.57                                                   | 0.102                                      |
| C4-C5             | $\sigma$ | C6-S8                | $\sigma^*$ | 7.72                       | 0.94                                                   | 0.076                                      |
| C31-C33           | $\sigma$ | C27-C31              | $\sigma^*$ | 6.4                        | 1.31                                                   | 0.082                                      |
| C35-C45           | $\sigma$ | C45-C68              | $\sigma^*$ | 6.03                       | 1.27                                                   | 0.078                                      |
| C4-C5             | $\sigma$ | C4-C6                | $\sigma^*$ | 5.97                       | 1.28                                                   | 0.078                                      |
| C79-C88           | $\sigma$ | C83-N100             | $\sigma^*$ | 5.03                       | 1.15                                                   | 0.068                                      |
| C5-S17            | $\sigma$ | C3-C4                | $\sigma^*$ | 4.8                        | 1.09                                                   | 0.065                                      |
| C80-C81           | $\sigma$ | C78-C80              | $\sigma^*$ | 4                          | 1.29                                                   | 0.064                                      |
| C92-N100          | $\sigma$ | C83-N100             | $\sigma^*$ | 3.6                        | 1.25                                                   | 0.06                                       |
| C2-C12            | $\sigma$ | C13-C15              | $\sigma^*$ | 3.1                        | 1.27                                                   | 0.056                                      |
| C79-N100          | $\sigma$ | C92-N100             | $\sigma^*$ | 2.9                        | 1.23                                                   | 0.054                                      |
| C10-C78           | $\sigma$ | C7-C9                | $\sigma^*$ | 2                          | 1.24                                                   | 0.045                                      |
| C40-H43           | $\sigma$ | C40-C41              | $\sigma^*$ | 1.5                        | 1.13                                                   | 0.037                                      |
| C58-H62           | $\sigma$ | C56-C58              | $\sigma^*$ | 1                          | 1.1                                                    | 0.03                                       |
| C53-C74           | $\sigma$ | C74-H77              | $\sigma^*$ | 0.7                        | 1.03                                                   | 0.024                                      |
| C66-N67           | $\sigma$ | C35-C45              | $\sigma^*$ | 0.52                       | 1.64                                                   | 0.026                                      |
| C13-S18           | $\sigma$ | C1-C2                | $\sigma^*$ | 0.51                       | 1.24                                                   | 0.023                                      |
| C40-H43           | $\sigma$ | C39-C102             | $\sigma^*$ | 0.5                        | 0.91                                                   | 0.019                                      |
| N100              | LP(1)    | C83-C97              | $\pi^*$    | 44.02                      | 0.31                                                   | 0.106                                      |
| O28               | LP(2)    | C1-C2                | $\pi^*$    | 31.17                      | 0.36                                                   | 0.101                                      |
| S14               | LP(2)    | C12-C13              | $\pi^*$    | 25.71                      | 0.25                                                   | 0.076                                      |
| S8                | LP(2)    | C9-C10               | $\pi^*$    | 23.54                      | 0.28                                                   | 0.073                                      |
| S18               | LP(2)    | C1-C2                | $\pi^*$    | 22.43                      | 0.27                                                   | 0.071                                      |
| F104              | LP(2)    | C38-C39              | $\pi^*$    | 0.79                       | 0.48                                                   | 0.019                                      |
| O44               | LP(2)    | C34-C41              | $\sigma^*$ | 20.78                      | 0.75                                                   | 0.113                                      |
| N69               | LP(1)    | C45-C68              | $\sigma^*$ | 12.67                      | 1.04                                                   | 0.103                                      |
| F103              | LP(2)    | C39-C102             | $\sigma^*$ | 6.21                       | 0.83                                                   | 0.064                                      |
| O28               | LP(1)    | C3-C4                | $\sigma^*$ | 3.3                        | 0.98                                                   | 0.051                                      |
| S14               | LP(1)    | C2-C12               | $\sigma^*$ | 0.7                        | 1.21                                                   | 0.026                                      |
| F105              | LP(1)    | C39-C102             | $\sigma^*$ | 0.53                       | 1.48                                                   | 0.025                                      |

**Table S29:** Natural bond orbitals analysis for TPD6 with its representative values.

| Donor( <i>i</i> ) | Type     | Acceptor( <i>j</i> ) | Type       | <i>E</i> (2)<br>[kcal/mol] | <i>E</i> ( <i>j</i> )- <i>E</i> ( <i>i</i> )<br>[a.u.] | <i>F</i> ( <i>i</i> , <i>j</i> )<br>[a.u.] |
|-------------------|----------|----------------------|------------|----------------------------|--------------------------------------------------------|--------------------------------------------|
| C25-C27           | $\pi$    | C31-C33              | $\pi^*$    | 30.07                      | 0.31                                                   | 0.086                                      |
| C58-C62           | $\pi$    | C55-C56              | $\pi^*$    | 24.86                      | 0.29                                                   | 0.076                                      |
| C20-C21           | $\pi$    | C25-C27              | $\pi^*$    | 24.8                       | 0.31                                                   | 0.079                                      |
| C40-C41           | $\pi$    | C38-C39              | $\pi^*$    | 22.57                      | 0.29                                                   | 0.074                                      |
| C55-C56           | $\pi$    | C57-C60              | $\pi^*$    | 21.02                      | 0.31                                                   | 0.072                                      |
| C85-C97           | $\pi$    | C80-C83              | $\pi^*$    | 20.1                       | 0.29                                                   | 0.07                                       |
| C78-C87           | $\pi$    | C77-C79              | $\pi^*$    | 18.65                      | 0.31                                                   | 0.068                                      |
| C80-C83           | $\pi$    | C77-C79              | $\pi^*$    | 17.22                      | 0.3                                                    | 0.066                                      |
| C1-C2             | $\pi$    | C4-C5                | $\pi^*$    | 15.3                       | 0.32                                                   | 0.065                                      |
| C36-C37           | $\pi$    | C35-C44              | $\pi^*$    | 11.04                      | 0.31                                                   | 0.053                                      |
| C77-C79           | $\pi$    | C9-C10               | $\pi^*$    | 9.7                        | 0.3                                                    | 0.05                                       |
| C31-C33           | $\pi$    | C31-C33              | $\pi^*$    | 2.26                       | 0.31                                                   | 0.024                                      |
| C67-N68           | $\pi$    | C65-N66              | $\pi^*$    | 0.82                       | 0.47                                                   | 0.018                                      |
| C65-N66           | $\pi$    | C67-N68              | $\pi^*$    | 0.73                       | 0.48                                                   | 0.017                                      |
| C15-C16           | $\pi$    | C15-C16              | $\pi^*$    | 0.71                       | 0.31                                                   | 0.014                                      |
| C44-C67           | $\sigma$ | C67-N68              | $\sigma^*$ | 8.4                        | 1.62                                                   | 0.105                                      |
| C67-N68           | $\sigma$ | C44-C67              | $\sigma^*$ | 8.37                       | 1.57                                                   | 0.103                                      |
| C25-C27           | $\sigma$ | C20-S22              | $\sigma^*$ | 8.17                       | 0.92                                                   | 0.078                                      |
| C15-C16           | $\sigma$ | C13-S18              | $\sigma^*$ | 7.04                       | 0.93                                                   | 0.073                                      |
| C12-C13           | $\sigma$ | C15-O29              | $\sigma^*$ | 6.3                        | 1.12                                                   | 0.075                                      |
| C4-C5             | $\sigma$ | C4-C6                | $\sigma^*$ | 5.98                       | 1.28                                                   | 0.078                                      |
| C55-C57           | $\sigma$ | C55-C56              | $\sigma^*$ | 4.9                        | 1.29                                                   | 0.071                                      |
| C47-C50           | $\sigma$ | C50-C52              | $\sigma^*$ | 4.2                        | 1.3                                                    | 0.066                                      |
| C79-C80           | $\sigma$ | C77-C79              | $\sigma^*$ | 4                          | 1.29                                                   | 0.064                                      |
| C20-C25           | $\sigma$ | C21-C24              | $\sigma^*$ | 3.1                        | 1.3                                                    | 0.057                                      |
| C91-N99           | $\sigma$ | C77-C78              | $\sigma^*$ | 3.02                       | 1.33                                                   | 0.057                                      |
| C78-N99           | $\sigma$ | C91-N99              | $\sigma^*$ | 2.9                        | 1.23                                                   | 0.053                                      |
| C45-C46           | $\sigma$ | C47-H51              | $\sigma^*$ | 2.4                        | 1.13                                                   | 0.047                                      |
| C15-O29           | $\sigma$ | S14-C16              | $\sigma^*$ | 1.8                        | 1.15                                                   | 0.041                                      |
| C87-C89           | $\sigma$ | C89-H90              | $\sigma^*$ | 1.4                        | 1.1                                                    | 0.035                                      |
| C47-H51           | $\sigma$ | C45-C47              | $\sigma^*$ | 1                          | 1.1                                                    | 0.03                                       |
| C113-H115         | $\sigma$ | C3-O28               | $\sigma^*$ | 0.57                       | 0.76                                                   | 0.019                                      |
| C67-N68           | $\sigma$ | C35-C44              | $\sigma^*$ | 0.54                       | 1.63                                                   | 0.027                                      |
| C101-F105         | $\sigma$ | C101-F103            | $\sigma^*$ | 0.52                       | 1.34                                                   | 0.024                                      |
| C102-F107         | $\sigma$ | C102-F106            | $\sigma^*$ | 0.51                       | 1.35                                                   | 0.024                                      |
| N99               | LP(1)    | C82-C96              | $\pi^*$    | 44.02                      | 0.31                                                   | 0.106                                      |
| O28               | LP(2)    | C1-C2                | $\pi^*$    | 31.06                      | 0.36                                                   | 0.101                                      |
| S8                | LP(2)    | C6-C7                | $\pi^*$    | 25.52                      | 0.26                                                   | 0.075                                      |
| S18               | LP(2)    | C1-C2                | $\pi^*$    | 22.44                      | 0.27                                                   | 0.071                                      |
| S23               | LP(2)    | C25-C27              | $\pi^*$    | 19.18                      | 0.27                                                   | 0.065                                      |
| F105              | LP(2)    | C36-C37              | $\pi^*$    | 0.63                       | 0.47                                                   | 0.017                                      |
| O43               | LP(2)    | C34-C41              | $\sigma^*$ | 21.31                      | 0.74                                                   | 0.113                                      |
| N66               | LP(1)    | C44-C65              | $\sigma^*$ | 12.7                       | 1.04                                                   | 0.103                                      |
| F107              | LP(2)    | C38-C102             | $\sigma^*$ | 7.12                       | 0.81                                                   | 0.068                                      |
| O29               | LP(2)    | C30-C109             | $\sigma^*$ | 5.22                       | 0.74                                                   | 0.057                                      |
| S17               | LP(1)    | C4-C5                | $\sigma^*$ | 2.98                       | 1.24                                                   | 0.054                                      |
| F104              | LP(1)    | C37-C101             | $\sigma^*$ | 0.53                       | 1.45                                                   | 0.025                                      |

**Table S30:** Dipole polarizability and major contributing tensor (*esu*) of the studied compounds (TPR and TPD1-TPD6).

| System | $\mu_x$ | $\mu_y$ | $\mu_z$ | $\mu_{total}$ |
|--------|---------|---------|---------|---------------|
| TPR    | 0.996   | 0.963   | 1.593   | 2.111         |
| TPD1   | 10.070  | -3.326  | -1.592  | 10.724        |
| TPD2   | 15.961  | 1.888   | -0.005  | 16.073        |
| TPD3   | 23.105  | 4.540   | 5.467   | 24.173        |
| TPD4   | 14.040  | 2.870   | 3.432   | 14.735        |
| TPD5   | -14.327 | -1.376  | 2.009   | 14.532        |
| TPD6   | 10.803  | -0.239  | -0.262  | 10.809        |

**Table S31:** Linear polarizability  $\langle\alpha\rangle$  and major contributing tensor (*esu*) of the studied compounds (TPR and TPD1-TPD6).

| System | $\alpha_{xx} (\times 10^{-22})$ | $\alpha_{yy} (\times 10^{-22})$ | $\alpha_{zz} (\times 10^{-22})$ | $\langle\alpha\rangle (\times 10^{-22})$ |
|--------|---------------------------------|---------------------------------|---------------------------------|------------------------------------------|
| TPR    | 6.23                            | 1.80                            | 0.89                            | 2.97                                     |
| TPD1   | 4.99                            | 1.70                            | 1.03                            | 2.57                                     |
| TPD2   | 5.50                            | 1.70                            | 1.10                            | 2.76                                     |
| TPD3   | 5.84                            | 0.01                            | 1.10                            | 2.89                                     |
| TPD4   | 5.23                            | 1.82                            | 0.99                            | 2.69                                     |
| TPD5   | 5.30                            | 1.71                            | 1.07                            | 2.69                                     |
| TPD6   | 5.33                            | 1.69                            | 1.12                            | 2.72                                     |

**Table S32:** The computed first hyperpolarizability ( $\beta_{tot}$ ) and major contributing tensors (*esu*) of the studied compounds (TPR and TPD1-TPD6).

| First                           | TPR   | TPD1  | TPD2  | TPD3  | TPD4  | TPD5  | TPD6  |
|---------------------------------|-------|-------|-------|-------|-------|-------|-------|
| <b>Hyperpolarizability</b>      |       |       |       |       |       |       |       |
| $\beta_{xxx} (\times 10^{-27})$ | 0.274 | 3.56  | 5.31  | 7.18  | 4.46  | -4.67 | -4.99 |
| $\beta_{xxy} (\times 10^{-28})$ | 0.329 | 1.92  | 1.71  | -3.46 | -1.08 | 0.343 | 1.95  |
| $\beta_{xyy} (\times 10^{-29})$ | 0.112 | 0.221 | 2.23  | 4.04  | -2.10 | 0.541 | -1.99 |
| $\beta_{yyy} (\times 10^{-30})$ | 4.59  | 1.34  | 27.6  | -7.21 | 17.3  | 8.04  | 11.3  |
| $\beta_{xxz} (\times 10^{-29})$ | 7.00  | 2.14  | -8.99 | 11.7  | 5.25  | 11.5  | 25.4  |
| $\beta_{yyz} (\times 10^{-30})$ | 2.60  | 5.68  | 12.2  | -6.23 | 2.51  | -3.80 | -2.16 |
| $\beta_{xzz} (\times 10^{-30})$ | 5.59  | -0.63 | 5.75  | 17.0  | 1.47  | -6.94 | -16.6 |
| $\beta_{yzz} (\times 10^{-30})$ | 0.036 | 0.87  | 0.23  | -2.51 | 1.69  | -2.88 | -2.05 |
| $\beta_{zzz} (\times 10^{-30})$ | 2.26  | 2.56  | 3.67  | -0.16 | 1.89  | -3.46 | -3.21 |
| $\beta_{tot} (\times 10^{-27})$ | 0.29  | 3.56  | 5.34  | 7.24  | 4.44  | 4.68  | 5.04  |

**Table S33:** Second hyperpolarizability  $\langle\gamma\rangle$  and major contributing tensor (*esu*) of the studied compounds (TPR and TPD1-TPD6).

| System | $\gamma_x (\times 10^{-32})$ | $\gamma_y (\times 10^{-34})$ | $\gamma_z (\times 10^{-35})$ | $\langle\gamma\rangle (\times 10^{-32})$ |
|--------|------------------------------|------------------------------|------------------------------|------------------------------------------|
| TPR    | 6.29                         | 1.94                         | 5.18                         | 6.31                                     |
| TPD1   | 4.39                         | 1.39                         | 5.50                         | 4.41                                     |
| TPD2   | 6.95                         | 3.32                         | 8.54                         | 7.00                                     |
| TPD3   | 9.96                         | 4.03                         | 16.8                         | 10.0                                     |
| TPD4   | 5.40                         | 1.29                         | 3.75                         | 5.40                                     |
| TPD5   | 5.66                         | 0.75                         | 3.09                         | 5.67                                     |
| TPD6   | 6.23                         | 2.13                         | 9.98                         | 6.25                                     |



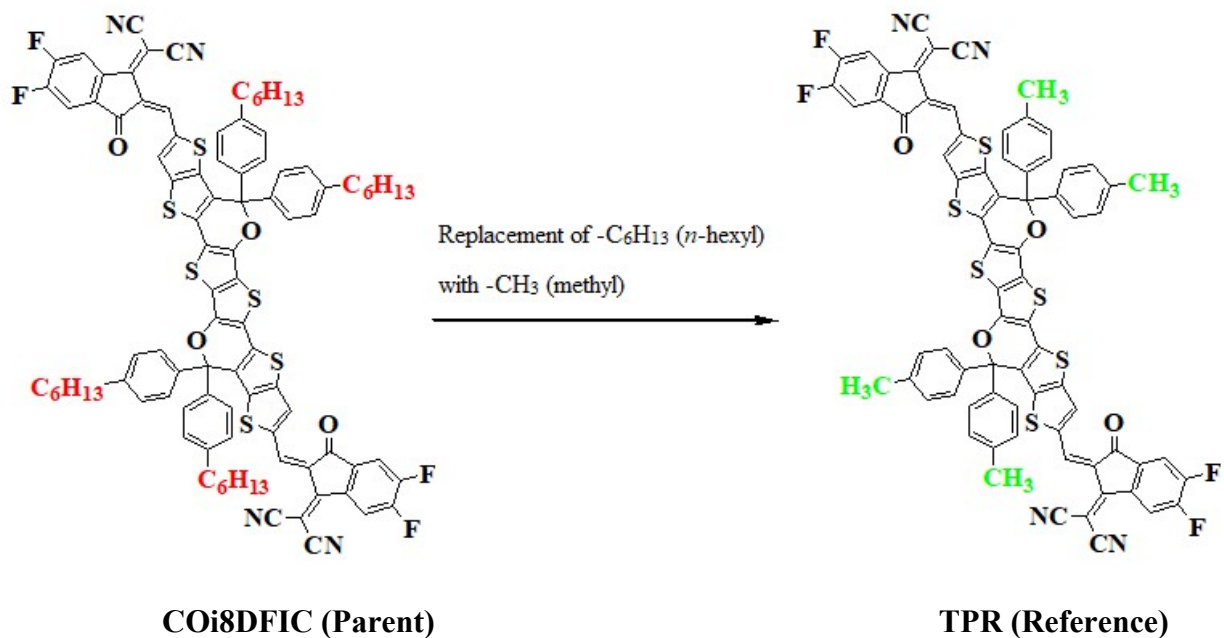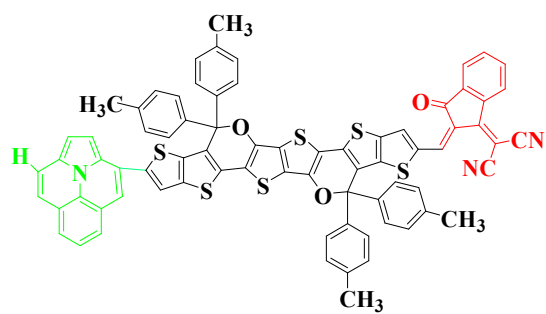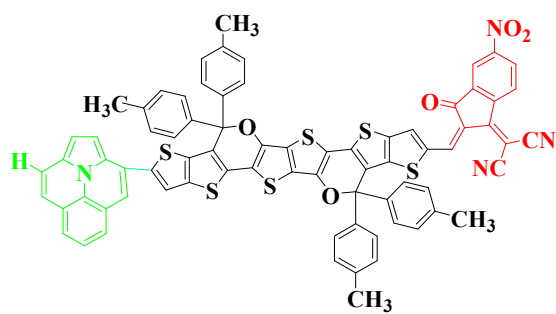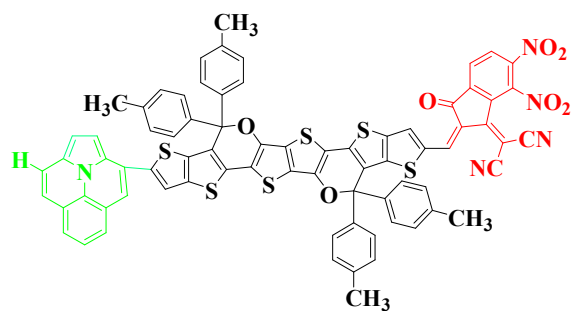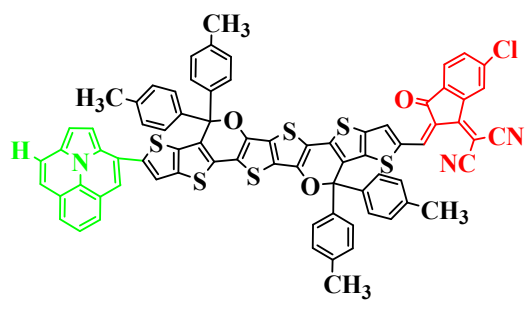

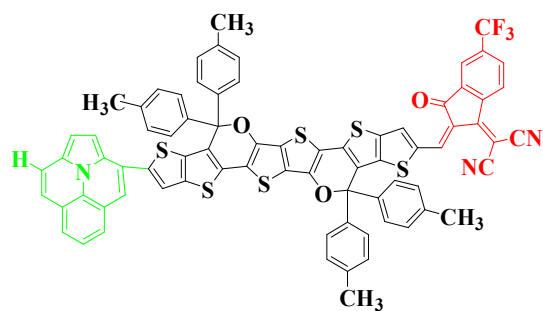

TPD5

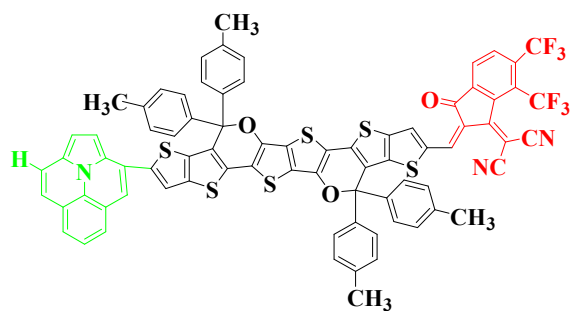

TPD6

Figure S1: Chemdraw structures of TPR and TPD1-TPD6.

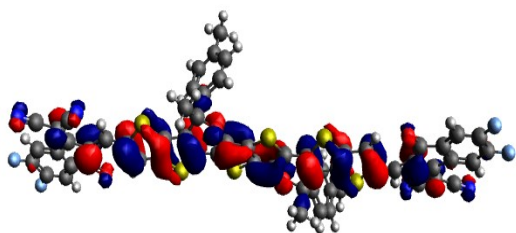

HOMO -1

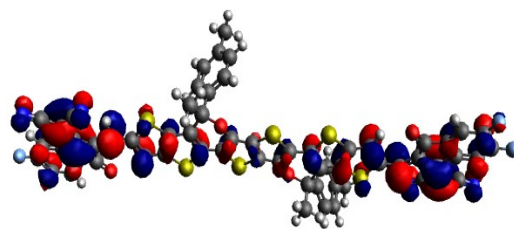

LUMO +1

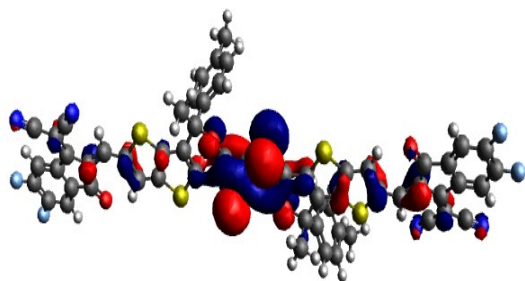

HOMO -2

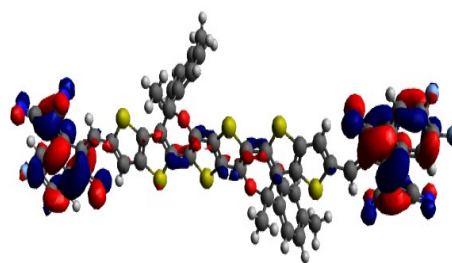

LUMO +2

TPR

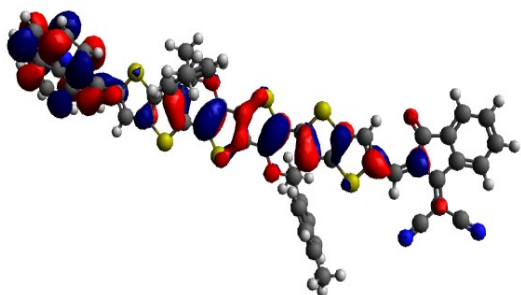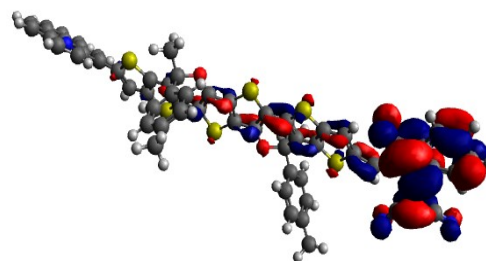

**HOMO -1**

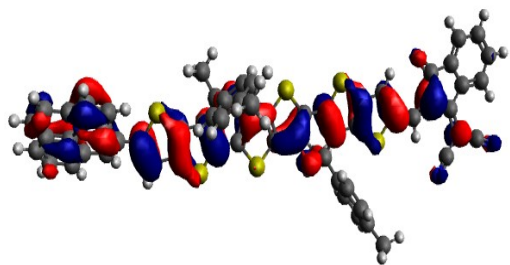

**LUMO +1**

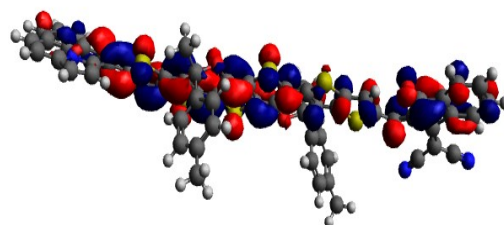

**HOMO -2**

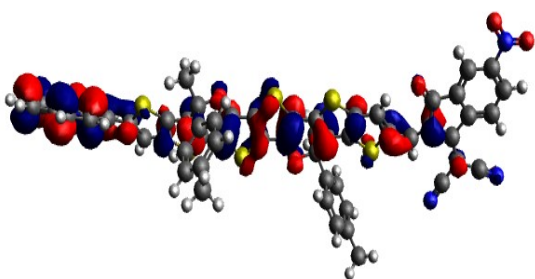

**LUMO +2**

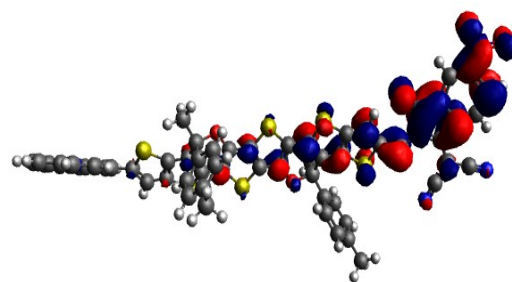

**TPD1**

**HOMO -1**

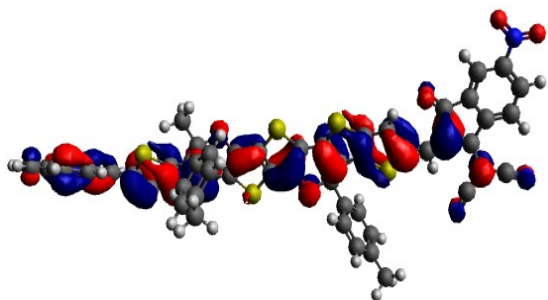

**LUMO +1**

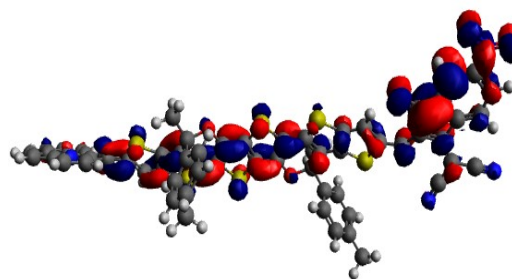

**HOMO -2**

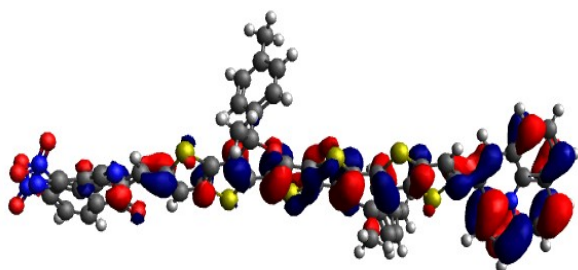

**LUMO +2**

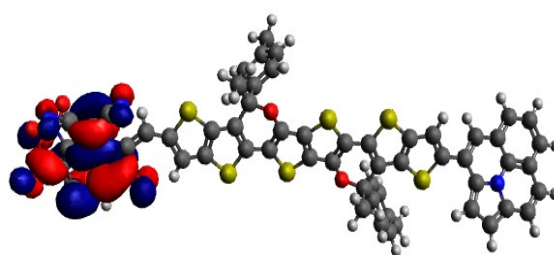

**TPD2**

**HOMO -1**

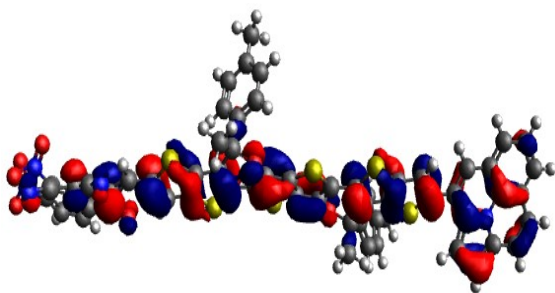

**LUMO +1**

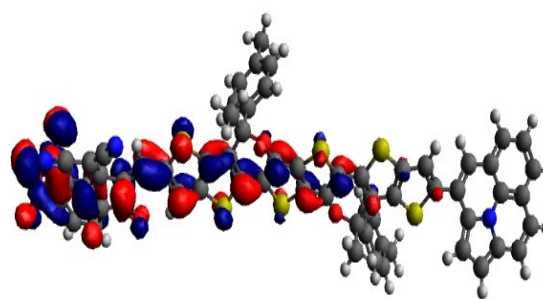

**HOMO -2**

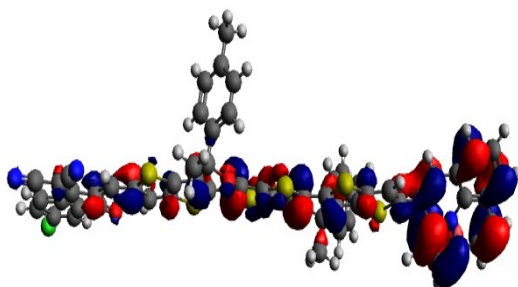

**LUMO +2**

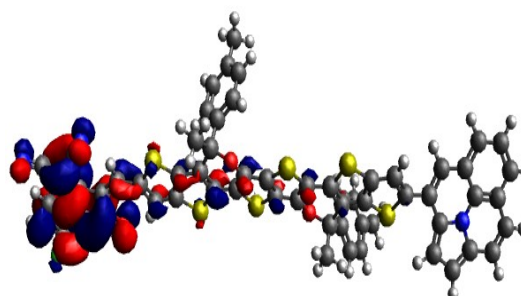

**TPD3**

**HOMO -1**

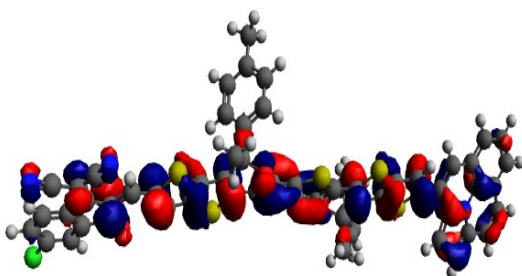

**LUMO +1**

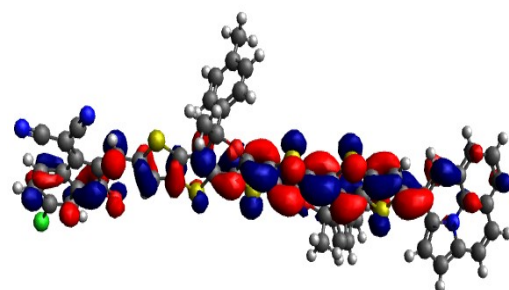

**HOMO -2**

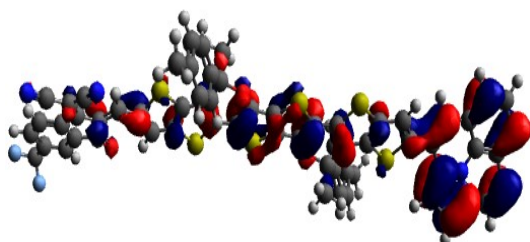

**LUMO +2**

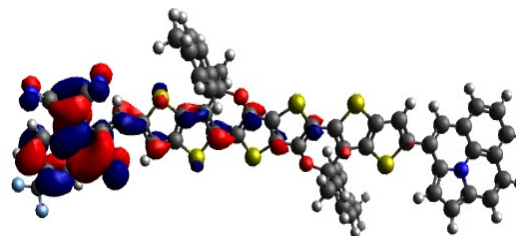

**TPD4**

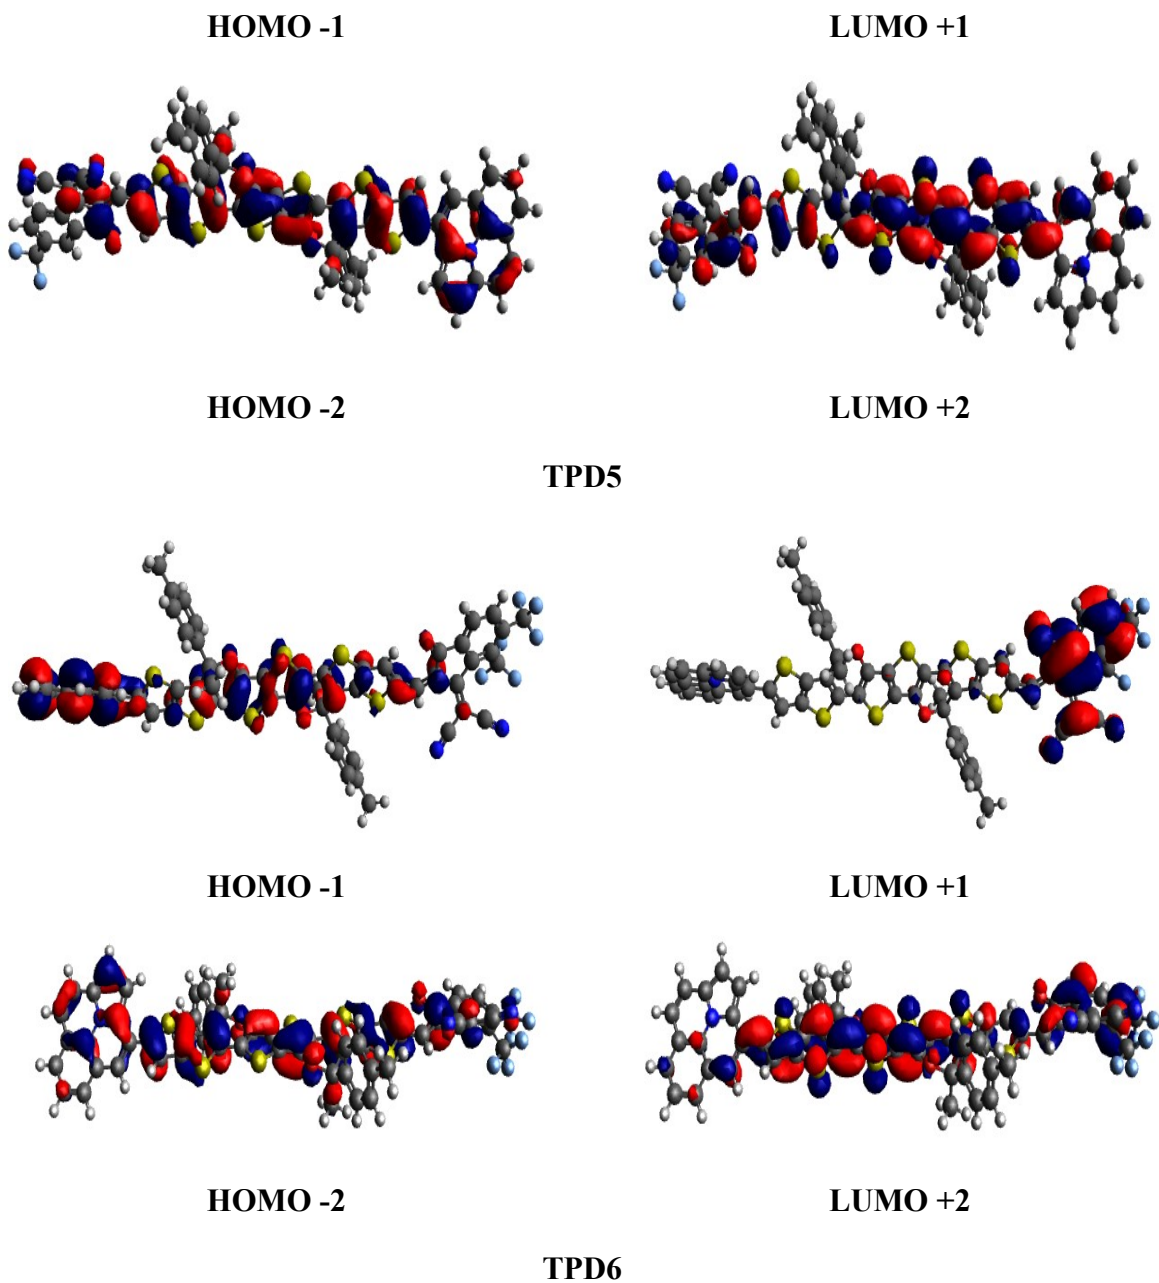

**Figure S2:** Graphical representation of HOMO-1/LUMO+1 and HOMO-2/LUMO+2 of TPR and TPD1-TPD6.

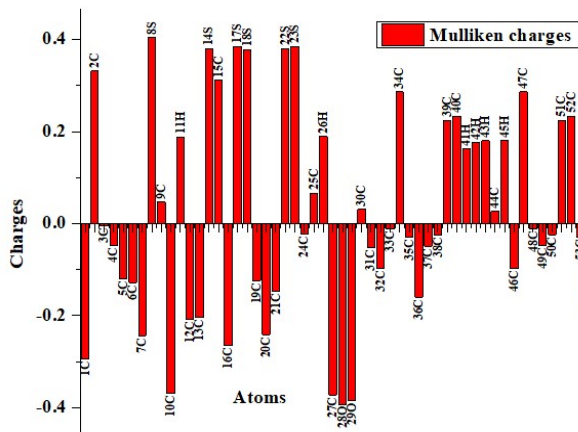

1<sup>st</sup> half

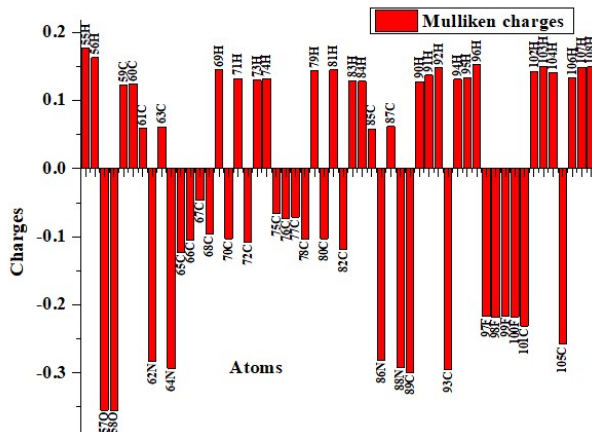

2<sup>nd</sup> half

TPR

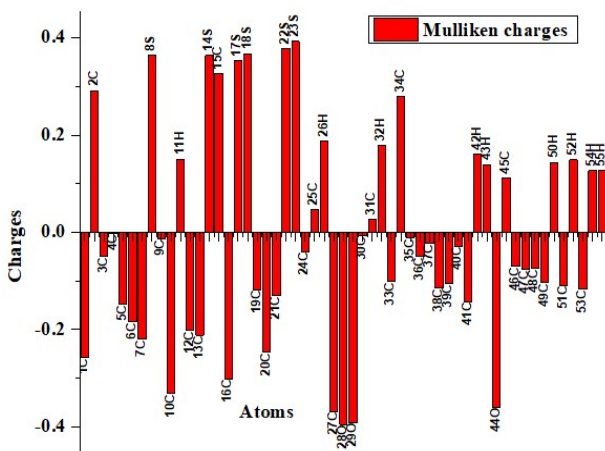

1<sup>st</sup> half

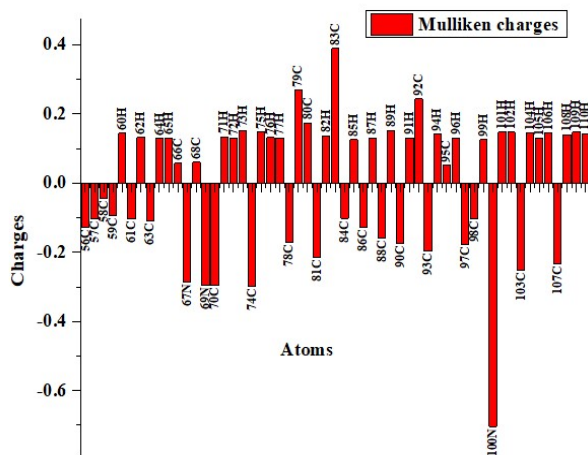

2<sup>nd</sup> half

TPD1

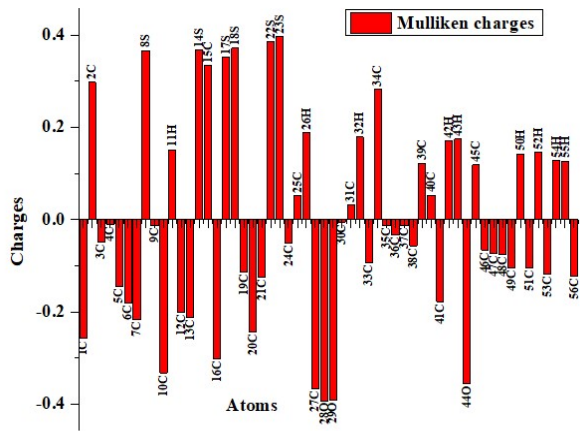

1<sup>st</sup> half

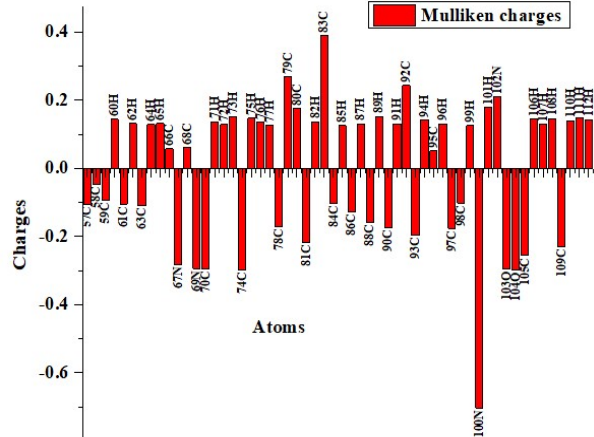

2<sup>nd</sup> half

TPD2

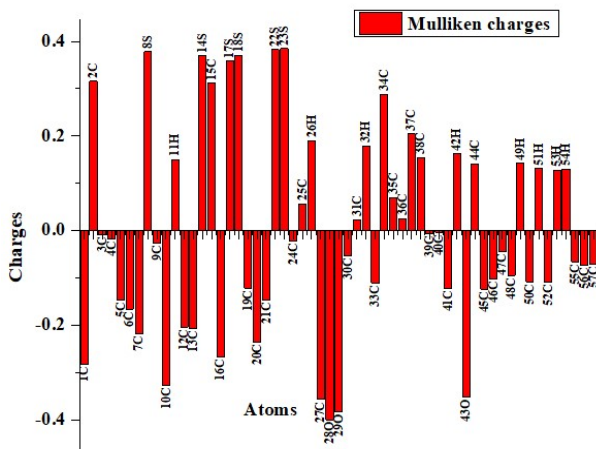

1<sup>st</sup> half

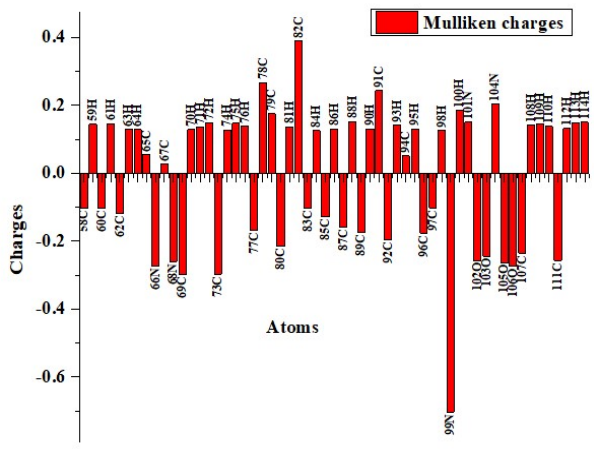

2<sup>nd</sup> half

TPD3

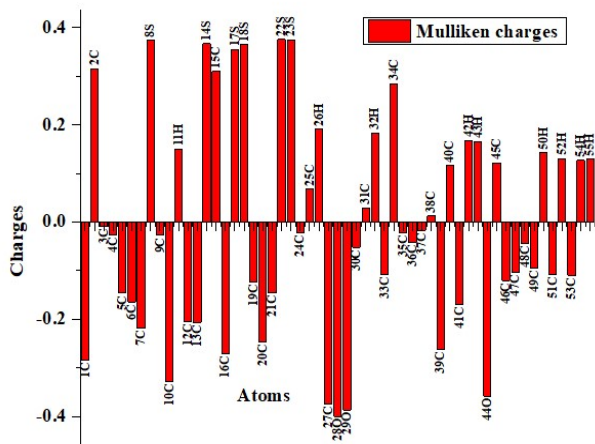

1<sup>st</sup> half

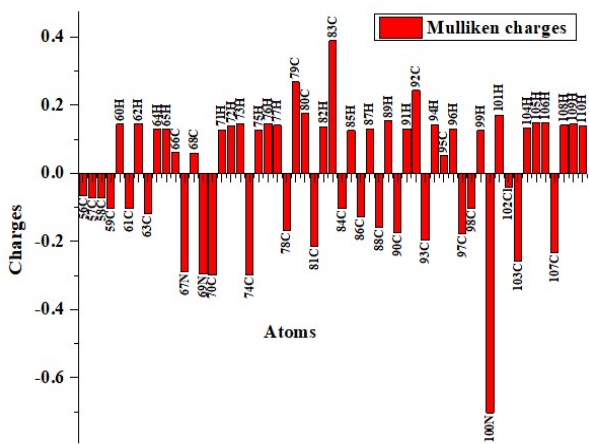

2<sup>nd</sup> half

TPD4

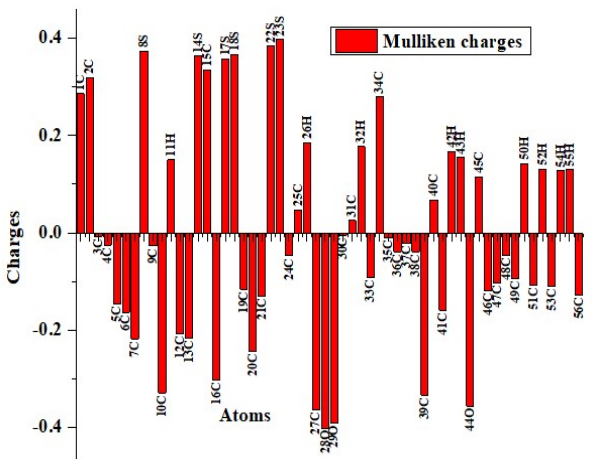

1<sup>st</sup> half

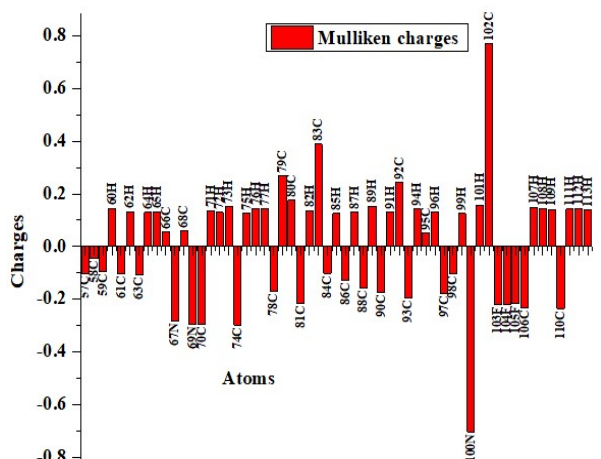

2<sup>nd</sup> half

TPD5



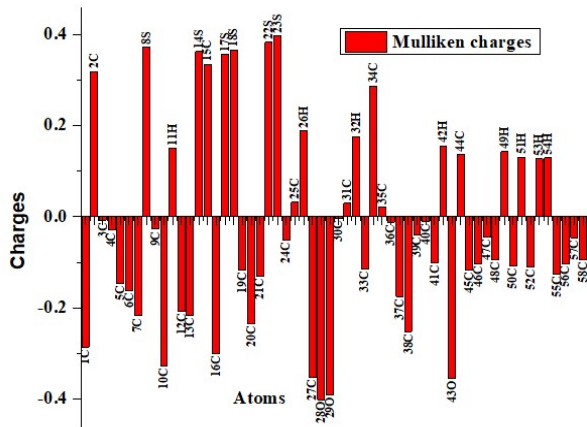

1<sup>st</sup> half

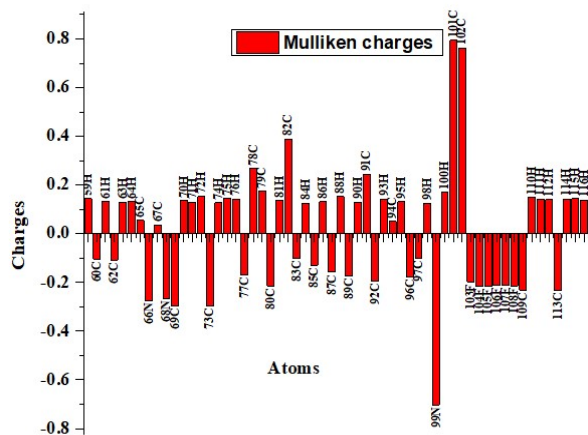

2<sup>nd</sup> half

TPD6

Figure S3: Graphical representation of natural population analysis of investigated compounds (TPR and TPD1-TPD6).
